1 **Evidence for enhanced neural tracking of the speech envelope under-**  
2 **lying age-related speech-in-noise difficulties**

3 Lien Decruey <sup>1,\*</sup>, Jonas Vanthornhout <sup>1</sup>, Tom Francart <sup>1</sup>

4 <sup>1</sup>KU Leuven - University of Leuven, Department of Neurosciences, ExpORL, B-3000 Leuven, Bel-  
5 gium

6 **\*Corresponding author:** Lien Decruey, KU Leuven - University of Leuven, Department of Neuro-  
7 sciences, ExpORL, Herestraat 49 bus 721, B-3000 Leuven, Belgium. Telephone: +3216303262.

8 Email: [lien.decruey@kuleuven.be](mailto:lien.decruey@kuleuven.be)

9 **Email addresses:**

- 10 • Lien Decruey: [lien.decruey@kuleuven.be](mailto:lien.decruey@kuleuven.be)  
11 • Jonas Vanthornhout: [jonas.vanthornhout@kuleuven.be](mailto:jonas.vanthornhout@kuleuven.be)  
12 • Tom Francart: [tom.francart@med.kuleuven.be](mailto:tom.francart@med.kuleuven.be)

13 **Running head:** Envelope tracking and speech perception across the lifespan

## 14 **Abstract**

15 When we grow older, understanding speech in noise becomes more challenging. Research has  
16 demonstrated the role of auditory temporal and cognitive deficits in these age-related speech-in-  
17 noise difficulties, beyond peripheral hearing loss. To better understand the neural mechanisms un-  
18 derlying these difficulties, we recruited young, middle-aged and older normal-hearing (NH) adults,  
19 and investigated the interplay between speech understanding, cognitive skills and neural track-  
20 ing of the speech envelope using electroencephalography (EEG). The stimuli consisted of natural  
21 speech masked by speech-weighted noise or a competing talker, presented at several subject-  
22 specific speech understanding levels. The results show that healthy aging resulted in a quadratic  
23 increase in the speech reception threshold, i.e., worse speech understanding, most pronounced for  
24 the competing talker. Similarly, advancing age was associated with a quadratic increase in enve-  
25 lope tracking with a pronounced enhancement for older adults. Additionally, envelope tracking was  
26 found to increase with speech understanding, and this was most apparent for older adults. Since  
27 the cognitive tests partly explained the variability in envelope tracking, our results support the hy-  
28 pothesis that enhanced envelope tracking in older adults are the result of the activation of a larger  
29 number of brain regions for processing speech, compared to younger adults. From a cognitive per-  
30 spective, this could reflect the inefficient use of cognitive resources, often observed in behavioral  
31 studies. Interestingly, the opposite effect of age was found for auditory steady state responses at  
32 low modulation frequencies, suggesting a complex interplay of different neural mechanisms with  
33 advancing age.

## 34 **Keywords:**

- 35 • neural tracking of the speech envelope
- 36 • aging
- 37 • electrophysiology
- 38 • speech understanding

## 39 **New & Noteworthy**

40 We measured neural tracking of the speech envelope across the adult lifespan and found a  
41 quadratic increase in envelope tracking with age. Using a more ecologically valid approach than  
42 auditory steady state responses, we found that young, older as well as middle-aged normal-  
43 hearing adults showed an increase in envelope tracking with speech understanding. Moreover,  
44 this association appeared to be stronger for older adults.

## 45 Introduction

46 Although people live longer, the rapid aging of the world population has also major implications for  
47 the society such as the increased need for specialized health care (United Nations, 2017). One of  
48 the major burdens that adults over 60 years old typically experience is the increased difficulty to  
49 communicate, especially in situations with background noise (World Health Organization, 2015).  
50 Since speech-in-noise problems can result in social isolation and an increased risk for cognitive  
51 impairment such as dementia (Wayne and Johnsrude, 2015; Goman and Lin, 2018), it is important  
52 to develop adequate, auditory diagnostic tests and rehabilitation strategies to cope with this.

53 Currently, hearing aids are the most well known rehabilitation devices to handle these speech-  
54 in-noise difficulties. Although they can compensate for the typical decreased audibility in the high  
55 frequencies by amplifying the signal, it has been demonstrated that they do not fully restore speech  
56 understanding (Tremblay et al., 2003). In addition, it has been shown that the difficulties for older  
57 compared to younger adults, are more pronounced for speech embedded in a competing talker  
58 than for maskers such as stationary speech-weighted noise (Goossens et al., 2017; Helfer and  
59 Freyman, 2014). Hence, a growing body of research supports the role of additional factors under-  
60 lying speech understanding problems beyond age-related hearing loss (CHABA, 1988; Humes et  
61 al., 2012; Martin and Jerger, 2005). As competing speech contains silent gaps, age-related tempo-  
62 ral processing deficits have been suggested to play a role in speech-in-noise difficulties (Füllgrabe  
63 et al., 2015; Hopkins and Moore, 2011; Helfer and Vargo, 2009). Additionally, it is known that  
64 competing speech not only results in a spectro-temporal overlap, i.e., energetic masking, but also  
65 requires high-level cognitive processes to inhibit the masker. It is therefore not surprising that sev-  
66 eral studies have demonstrated an association between the age-related decline of cognitive func-  
67 tions and the increased difficulty on speech-in-noise tests (Janse and Jesse, 2014; Janse, 2012;  
68 Cahana-Amitay et al., 2015; Desjardins and Doherty, 2013; Füllgrabe et al., 2015; Gordon-Salant  
69 and Cole, 2016).

70 Whether the increased difficulty with informational maskers with advancing age is purely due to  
71 a deficient temporal processing or age-related cognitive decline, is difficult to examine, as these  
72 are closely intertwined (CHABA, 1988; Martin and Jerger, 2005; Humes et al., 2012). Although a

73 combination of these factors and peripheral hearing loss are likely to underlie most speech under-  
74 standing problems, more insight is still needed into the specific contribution of each factor. Different  
75 techniques can be used to disentangle these factors (reviews of Pichora-Fuller and Souza, 2003,  
76 and Humes et al. (2012)). The most common and appropriate way is recruiting persons across  
77 the lifespan with audiometric thresholds within the normal range and screening them for cogni-  
78 tive impairment. In spite of this design, it remains very difficult to disentangle these factors when  
79 only administering behavioral tests (Humes et al., 2012; Schoof and Rosen, 2014). Therefore, a  
80 growing body of research is using objective techniques to investigate the neural changes of aging  
81 related to speech processing, which cannot be predicted from the audiogram.

82 With advancing age, anatomical changes occur along the whole auditory pathway, from the spiral  
83 ganglion neurons, mid brain up to the auditory cortex (Kraus and Anderson, 2013; Peelle and  
84 Wingfield, 2016; Cardin, 2016). Additionally, functional changes have been found such as the loss  
85 of connectivity between cortical brain regions and increased bilateral activity in regions outside  
86 the core speech processing network (Peelle et al., 2010; Wong et al., 2009; Davis et al., 2008;  
87 Cabeza, 2002). Since speech processing is a rapid, time-varying phenomenon, methods with a  
88 high time resolution, such as magneto- and electroencephalography (MEG and EEG), are required  
89 to accurately investigate this (Lopes da Silva, 2013). In recent years, studies using MEG or EEG  
90 have consistently shown a decrease in the amplitude of responses that are mainly generated in  
91 the brain stem with advancing age (Bidelman et al., 2014; Anderson et al., 2012; Presacco et al.,  
92 2016b; Goossens et al., 2016; Leigh-Paffenroth and Fowler, 2006). For the cortex on the other  
93 hand, no general consensus has been found yet. In most research, higher response amplitudes  
94 have been observed during the presentation of non-speech sounds or short syllables (Bidelman  
95 et al., 2014; Sörös et al., 2009; Tlumak et al., 2015). Goossens et al. (2016) for example, found  
96 higher amplitudes for 4 Hz auditory steady-state responses (ASSRs) in normal-hearing (NH) older  
97 than young and middle-aged adults. Similarly, increased neural speech envelope tracking has  
98 been found for NH older adults (Presacco et al., 2016b). In contrast, studies have also shown a  
99 decrease in neural tracking of frequency modulated (FM) stimuli with advancing age (Henry et al.,  
100 2017) or no change for 20 Hz ASSRs (Goossens et al., 2016; Leigh-Paffenroth and Fowler, 2006;  
101 Grose and Mamo, 2010).

102 These controversial results are likely to be due to methodological differences. Researchers have  
103 been using different techniques but also diverse types of sounds such as clicks, frequency or ampli-  
104 tude modulated tones. Only recently, single-trial paradigms were used to measure neural tracking  
105 of the envelope of a continuous speech stimulus to study the processing of natural speech in noise  
106 (Kong et al., 2015; Ding and Simon, 2012; O’Sullivan et al., 2015; Das et al., 2016). To our knowl-  
107 edge, only one study has used a similar approach to investigate the effect of age. Presacco et  
108 al. (2016b) presented two stories to a group of young (18-27 years) and a group of older (61-73  
109 years) NH listeners and instructed them to attend to one talker and ignore the other. The stories  
110 were presented at different signal-to-noise ratios (SNRs: quiet, +3, 0, -3 and -6 dB SNR). To mea-  
111 sure the cortical tracking of the envelope, the envelope of the attended talker was reconstructed  
112 from MEG responses. Based on the correlation between the actual speech envelope and the re-  
113 constructed envelope, it was found that older adults had an enhanced cortical representation of  
114 the attended speech envelope compared to their younger counterparts. According to the authors,  
115 these results suggest a possible imbalance between inhibitory and excitatory processes or the loss  
116 of connections between different brain regions.

117 The benefit of the approach used by Presacco et al. (2016b) is that the stimulus closely resembles  
118 daily life speech and is only presented once, in a single-trial paradigm. Therefore, it is more eco-  
119 logically valid than objective measures based on the responses to repeated, short, artificial stimuli,  
120 such as auditory brain stem responses (ABRs), cortical evoked responses or ASSRs. Additionally,  
121 envelope tracking measures can be used to objectively evaluate a person’s speech understanding  
122 as there is ample evidence that the envelope is an important cue for speech perception (Shan-  
123 non et al., 1995; Drullman et al., 1994) and studies have shown an increase in neural envelope  
124 tracking with increasing speech understanding for young NH participants (Ding and Simon, 2013;  
125 Vanthornhout et al., 2018; Kong et al., 2015; Peelle et al., 2013).

126 The present study was designed to further investigate the effect of age on neural envelope tracking  
127 and speech understanding in young, middle-aged and older NH adults by measuring envelope  
128 tracking using a single-trial and more ecologically valid method than ASSRs. Firstly, we expect,  
129 based on the results of Presacco et al. (2016b), to find enhanced envelope tracking with advancing  
130 age. In contrast to Presacco et al. (2016b), who compared MEG-responses of two extreme age

131 groups, we also included middle-aged NH adults as it has been shown that speech understanding  
132 (Goossens et al., 2017; Helfer and Freyman, 2014) and cognitive function (Vercammen et al., 2016;  
133 Singh-Manoux et al., 2012) start to decrease from 45-50 years on. Secondly, we further extend  
134 the findings of Presacco et al. (2016b) by directly investigating the association between speech  
135 understanding and envelope tracking. Similarly to a recent study of Vanthornhout et al. (2018)  
136 conducted in young NH adults, we hypothesize to also find an increase in envelope tracking with  
137 speech understanding for middle-aged and older NH adults. To investigate this, participants are  
138 instructed to recall standardized sentences out loud during the EEG-recording. This way a more  
139 direct association between envelope tracking and speech understanding is ensured compared to  
140 previous studies in which neural responses are related to ratings or behavioral scores obtained  
141 before or after the EEG-recording (Ding and Simon, 2013; Vanthornhout et al., 2018; Anderson et  
142 al., 2011; Goossens et al., 2018). Additionally, we not only presented sentences at highly intelligible  
143 fixed SNRs as Presacco et al. (2016b), but also presented the stimuli at several subject-specific  
144 SNRs to ensure a range of different speech understanding levels for each individual.

## 145 **Material and Methods**

### 146 **Participants**

147 To investigate the effect of age beyond age-related hearing loss and cognitive impairment, middle-  
148 aged and older adults were recruited through a screening across Flanders, Belgium. Adults with  
149 normal hearing in both ears were recruited, with no indication of cognitive impairment or learning  
150 disability. From the 84 adults aged older than 44 years, only 40 persons met the inclusion criteria.  
151 This was not unexpected since hearing declines from 40 years on, especially in men (Moore et  
152 al., 2014; International Organization for Standardization, 2000). Additionally, persons were also  
153 excluded when a lower score than 26/30 was obtained on the Montreal Cognitive Assessment  
154 (MoCA; Nasreddine et al., 2005). Lastly, the medical history and the presence of learning disabili-  
155 ties were questioned because serious concussions, medication used to treat for example insomnia  
156 (Van Lier et al., 2004) as well as learning disabilities such as dyslexia are known to affect brain

157 responses (Power et al., 2016; Poelmans et al., 2012; De Vos et al., 2017).

158 After screening, a total of 47 participants (11 men and 36 women) participated in the study. Their  
159 age ranged from 17 until 82 years (histogram of ages, see figure 1). All participants had Flemish  
160 as their mother tongue and were normal hearing in both ears (thresholds from 125 until 4000 Hz  
161 lower or equal to 30 dB HL; figure 2). A symmetrical hearing was ensured based on the criteria  
162 derived from the AMCLASS algorithm of Margolis and Saly (2008). Lastly, we examined the hand-  
163 edness and ear preference of our participants using a Flemish, modified version of the laterality  
164 preference inventory of Coren (1993) to choose the stimulation ear. This study was approved by  
165 the Medical Ethics Committee UZ KU Leuven / Research (reference no. S57102 (Belg. Regnr:  
166 B322201422186) and S58970 (Belg. Regnr: B322201629016)). All participants gave their written  
167 informed consent, and were paid for their participation if they were older than 35 years.

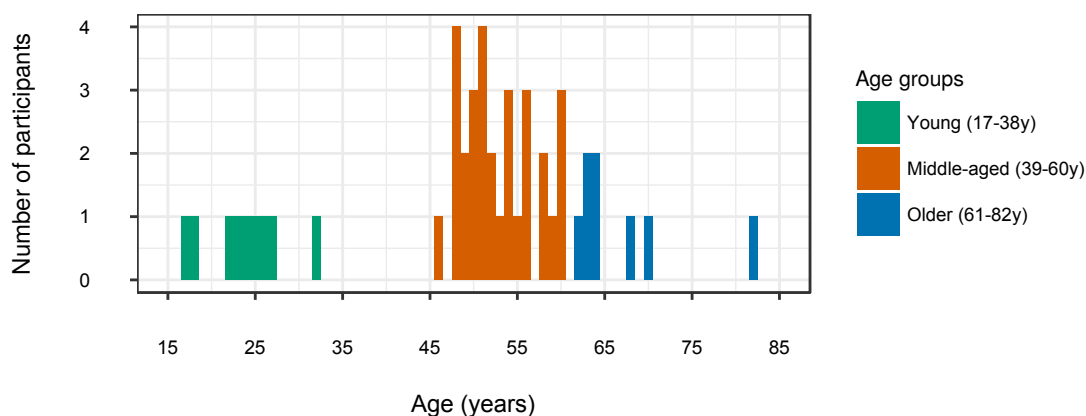

Figure 1: Distribution of the number of participants per age



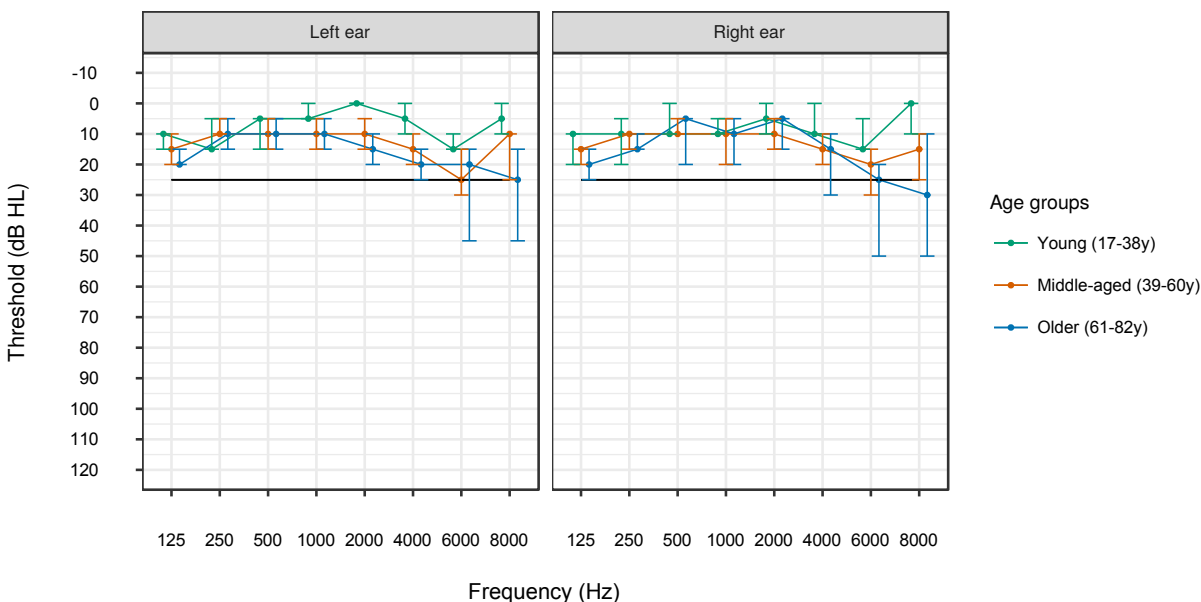

Figure 2: Median air conduction thresholds (in dB HL) of young, middle-aged and older participants. Error bars indicate the interquartile range.

## 168 Stimuli

169 For the behavioral and EEG experiment, we used the same target stimuli and maskers. Moreover,  
170 we presented Matrix sentences as well as a story to the participants because the structure of  
171 the Matrix sentences does not resemble daily life communication. Two maskers were chosen as  
172 previous studies have shown that the effect of age can be more detrimental for competing talkers  
173 than for purely energetic maskers. In addition to these stimuli, two other stimuli were used in the  
174 present study. Firstly, a story was presented to train the linear decoder used to reconstruct the  
175 speech envelope from the EEG (see Signal processing). Secondly, tone pips were presented to  
176 evaluate the effect of age on the responses to non-speech stimuli and to investigate if a similar  
177 effect of age can be found compared to responses to speech stimuli (see EEG experiment).

## 178 **Target stimuli**

179 In this study, we used the Flemish Matrix sentence test (Luts et al., 2014) to evaluate a participant's  
180 speech understanding behaviorally. The Matrix sentence test consists of 13 lists of 20 sentences  
181 where each sentence has a fixed syntax structure of 5 word categories "name, verb, numeral, color  
182 and object" (e.g. "Lucas draagt twaalf paarse boten" ("Lucas carries twelve purple boats")). During  
183 the test, participants are instructed to recall the heard sentence using a 5 x 11 matrix containing 10  
184 possibilities for each word of the sentence as well as the option to give no answer. The percentage  
185 of correctly recalled words is used as a measure for speech understanding.

186 Although the Matrix sentences are translated into different languages to evaluate a person's speech  
187 understanding, the structure of these sentences does not resemble daily life communication. To get  
188 more insight in daily life speech understanding, we chose to also present commercial recordings  
189 of stories to our participants similar to studies investigating the cocktail party phenomenon (e.g.  
190 O'Sullivan et al., 2015; Das et al., 2016; Ding and Simon, 2012). The story that we used in this  
191 study is "De Wilde Zwanen" by Hans Christian Andersen, narrated by a female, Flemish talker and  
192 was 28 minutes long. The Story was set to the same root mean square level and spectrum as the  
193 Matrix sentences and silences were shortened to a maximum duration of 200 ms based on the  
194 results of a previous study (Decruy et al., 2018).

## 195 **Maskers**

196 To investigate how envelope tracking is affected by speech understanding, several levels of speech  
197 understanding were created by adding background noise. As shown before by Goossens et al.  
198 (2017) and Helfer and Freyman (2014), competing speech can have a more detrimental effect  
199 on speech understanding with advancing age compared to speech-weighted noise. As competing  
200 speech contains silent gaps, the listener could reconstruct the target more easily and achieve better  
201 speech understanding compared to a stationary masker (Festen and Plomp, 1990; Francart et al.,  
202 2011; Koelewijn et al., 2012). However, this potential benefit depends on the temporal processing  
203 ability of the listener which appears to deteriorate with healthy aging (Desjardins and Doherty,  
204 2013; Füllgrabe et al., 2015). To investigate this, we examined the effect of both a stationary

205 speech-weighted noise (SWN) and a competing talker (CT) on speech understanding in the present  
206 study. For the Matrix sentences as well as the Story, we created a SWN which had the same long-  
207 term-average spectrum as the target stimulus. This resulted in optimal spectral masking, also  
208 called energetic masking. For the informational masker, we used a second story, “Bianca en Nero”  
209 by Béatrice Deru-Renard which was narrated by a male, Flemish talker in contrast to our target  
210 stimulus. Similar to the target Story, the silences of the CT were shortened to 200 ms and the  
211 spectrum as well as the root mean square level were matched to the those of the target stimulus.

## 212 **Set-up**

### 213 **Environment**

214 In a first session, the behavioral experiments were conducted at the research group ExpORL from  
215 the KU Leuven or at home. For all participants, the second session took place at the research  
216 group to record the EEG in a triple-walled, soundproof booth, equipped with a Faraday cage to  
217 avoid electromagnetic interference.

### 218 **Auditory stimulation**

219 For the auditory stimulation, we used a laptop connected to a RME Hammerfall DSP Multiface II or  
220 RME Fireface UC soundcard (RME, Haimhausen, Germany), running the software platform APEX  
221 (Dept. Neurosciences, KU Leuven) (Francart et al., 2008). The target speech stimuli were pre-  
222 sented monaurally through ER-3A insert phones (Etymotic Research, Inc., IL, USA) at an intensity  
223 of 55 dB SPL (A weighted). For all participants except one, stimuli were presented to the right ear.  
224 The maskers, SWN or CT, were presented to the same ear as the target stimulus and their levels  
225 were adjusted according to the chosen SNR. Before administering the experiments, all stimuli were  
226 first calibrated with a type 2260 sound level pressure meter, a type 4189 half-inch microphone and  
227 a 2cc coupler (Bruel & Kjaer, Copenhagen, Denmark).

## 228 **EEG recording**

229 To record the EEG, we used a BioSemi ActiveTwo system (Amsterdam, Netherlands), with 64 ac-  
230 tive Ag/AgCl electrodes and two extra electrodes, serving as the common electrode (CMS) and  
231 current return path (DRL), respectively. Electrodes were mounted in head caps containing elec-  
232 trode holders placed according to the 10-20 electrode system. The EEG recordings were digitized  
233 at a sampling rate of 8192 Hz and stored on a hard disk using the BioSemi ActiView software.

## 234 **Experimental procedures**

235 After screening, all participants first completed the behavioral experiment in which speech under-  
236 standing in noise was evaluated for two speech materials, Matrix and Story, and two maskers,  
237 SWN and CT. The outcome of the speech-in-noise test was not only used to assess the effect  
238 of age on speech understanding but also to determine equivalent speech understanding levels  
239 across participants for the EEG experiment. In addition, two cognitive tasks were administered to  
240 investigate the contribution of working memory and inhibition. Finally, EEG was used to measure  
241 neural envelope tracking and get insight into the interplay between age, speech understanding and  
242 envelope tracking. An overview of the main procedures is depicted in figure 3.

## 243 **Speech understanding in noise: behavioral experiment**

244 During the Matrix sentence test, participants were instructed to recall sentences. An adaptive  
245 procedure was chosen to converge as quickly as possible to the speech reception threshold (SRT;  
246 SNR at which 50% speech understanding is achieved). For this test, the procedure of Brand and  
247 Kollmeier (2002) was used to adapt the level of the masker (Luts et al., 2014). To avoid confounds  
248 of procedural learning, two training lists of each 20 sentences were first administered. The Matrix  
249 sentences were presented in both SWN and CT and the order of presenting first SWN or CT was  
250 randomized across participants. The SRT was defined as the last SNR presented in a list of 20  
251 sentences.

252 After the Matrix sentence test, we administered an adapted version of the self-assessed Békesy

253 procedure (Decruey et al., 2018) to create equivalent speech understanding levels for the Story used  
254 during the EEG experiment. During this procedure, participants were provided with a scale from 0  
255 to 100% to rate their speech understanding. Based on these ratings, the level of the masker was  
256 adapted until the procedure converged to the SRT. The procedure was administered at least twice  
257 and the SRT was determined as the average of the last presented SNR of these two runs. When  
258 the outcome of a run differed more than 3 dB with the previous, a third run was administered. In  
259 this case, the average of the last presented SNR of the second and third run was used as the SRT  
260 in order to exclude procedural learning effects.

261 To ensure comparable understanding levels for Matrix and Story as well as to avoid the confounds  
262 of rating biases, we used the difference in SRT between Matrix and Story on the self-assessed  
263 Békesy procedure (Decruey et al., 2018), further described as “Békesy procedure”, as an adjust-  
264 ment value. Consequently, the Story adjustedSRT per participant was calculated by subtracting  
265 this adjustment value from the SRT on the Matrix test (Figure 3). In the beginning of the study,  
266 the Békesy procedure was only administered in the presence of SWN. However, during the EEG  
267 recording of the first participants (13/47), we noticed that the difference in SRT between Matrix  
268 and Story was substantially larger when using CT as masker (i.e., more than two times the differ-  
269 ence in SWN). Hence, for the remaining participants, the Békesy procedure was administered for  
270 both maskers. The Story adjustedSRT was first calculated based on the results in SWN and if the  
271 difference between Matrix and Story was substantially larger for CT compared to SWN, the Story  
272 adjustedSRT was adapted. While this led to differences across participants in the determination of  
273 the adjustment value, we do not believe that this influenced our results as we analyzed envelope  
274 tracking in function of the exact speech understanding percentages calculated or rated during the  
275 EEG experiment.

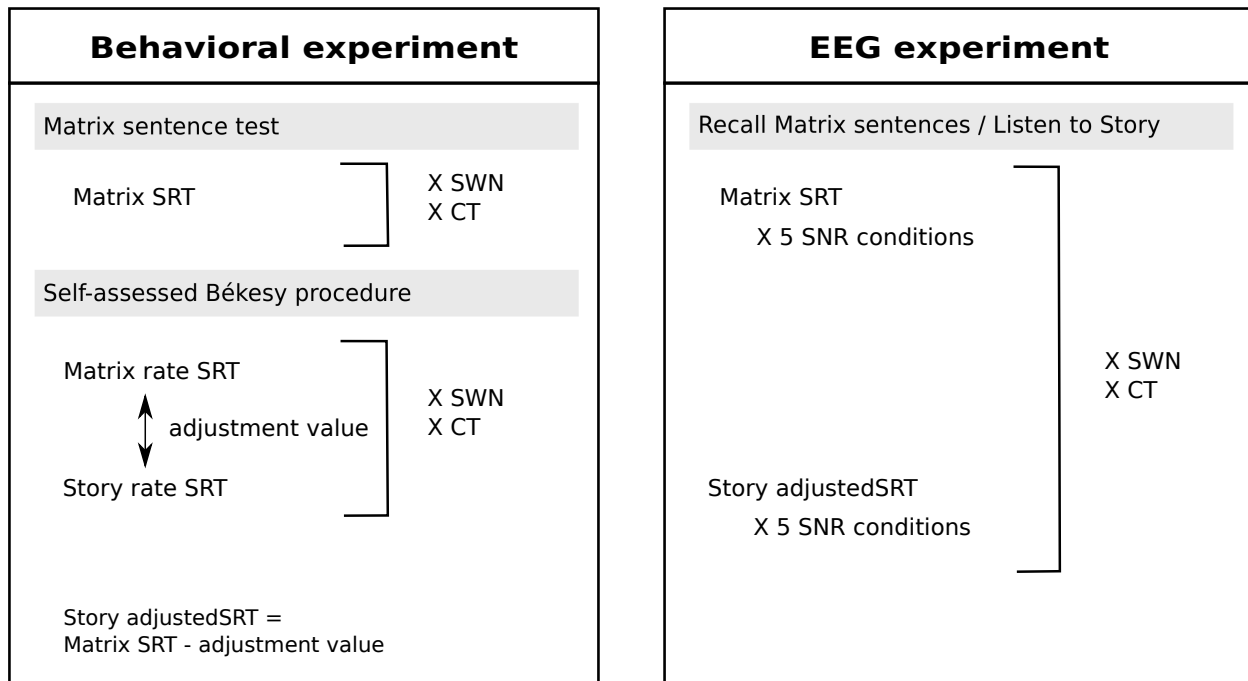

Figure 3: An overview of the main experiments conducted during the behavioral and EEG experiment.

## 276 Envelope tracking and cortical responses to tone pips: EEG experiment

277 For each participant, we started the EEG experiment with the tone pips. The tone pips were created  
278 using a sinusoid with a carrier frequency of 500 Hz and a total duration of 21 ms (4 ms on- and off-  
279 ramps). With an inter stimulus interval of 500 ms, repeating these tone pips resulted in a repetition  
280 frequency of approximately 1.92 Hz. In total, 250 tone pips were presented to each participant at  
281 an intensity of 90 dBpeSPL. After the tone pips, one block of the Matrix and one of the Story were  
282 presented, within each block all the different SNR conditions per masker (see table 1). Next, the  
283 story "Milan" that lasts 12 minutes and is written and narrated by Stijn Vranken, was presented  
284 without masker to have an optimal condition to create a linear decoder (see Signal Processing),  
285 followed by the remaining two blocks of the Matrix and Story. The order of the Matrix and Story  
286 was quasi-randomized across participants as well as the order of the maskers. For example, when  
287 the Matrix sentences were presented first in SWN, CT was used to mask the Story that preceded.  
288 Alternating the maskers kept the participants motivated.

289 **Procedure for Matrix and Story**

290 During the EEG experiment, the participants were seated in a comfortable chair. Participants were  
 291 asked to recall the Matrix sentences out loud, trial-by-trial similar to the behavioral test. This way,  
 292 their speech understanding score per condition could be determined and directly associated to  
 293 the EEG responses. For the Story, persons were asked to actively listen and answer a question  
 294 about the content to keep them alert. In addition, participants were also asked to rate their speech  
 295 understanding for both Matrix and Story using the same scale as for the Békesy procedure. Based  
 296 on the percentage correctly repeated words for the Matrix sentences, a direct association between  
 297 envelope tracking and speech understanding could be investigated. For the Story, we adjusted  
 298 the ratings of the participants by adding the difference score between the percentage correctly  
 299 repeated words and the rated percentage for the Matrix sentences, per masker condition.

Table 1: Overview of the different Matrix and Story conditions for both maskers, presented during the EEG experiment (e.g. SNR at which a speech understanding (SU) score of 20% should be achieved: 20% SU). To avoid rating bias, we created the Story adjustedSRT (Figure 3).

| SNR      | SWN      |                  | CT       |                  |
|----------|----------|------------------|----------|------------------|
|          | Matrix   | Story            | Matrix   | Story            |
| 20% SU   | SRT-3 dB | adjustedSRT-3 dB | SRT-4 dB | adjustedSRT-4 dB |
| 50% SU   | SRT      | adjustedSRT      | SRT      | adjustedSRT      |
| 80% SU   | SRT+3 dB | adjustedSRT+3 dB | SRT+4 dB | adjustedSRT+4 dB |
| 95% SU   | SRT+6 dB | adjustedSRT+6 dB | SRT+8 dB | adjustedSRT+8 dB |
| fixedSNR | No noise | No noise         | 0 dB SNR | 0 dB SNR         |

300 As shown in table 1, we presented the Matrix sentences and Story at different specific SNRs to  
 301 obtain a speech understanding score which could be directly associated to envelope tracking. We  
 302 created four subject-specific SNR levels by lowering and raising the individual Matrix and Story  
 303 adjustedSRT by one or two times 3 dB. This way, we could create equivalent, subject-specific  
 304 speech understanding levels which covered the psychometric function of each individual (20%,  
 305 50%, 80%, 95% speech understanding). As can be inferred from table 1, a larger step size of 4  
 306 dB was used for CT since using fluctuating maskers results in less steeply psychometric functions

307 compared to stationary maskers (Francart et al., 2011; Macpherson and Akeroyd, 2014). In addition  
308 to the subject-specific SNRs, two fixed SNRs across participants were presented. In the block  
309 where CT was the masker, we presented the target and competing talker at the same level, in  
310 other words, 0 dB SNR. In the SWN block, the target talker was also presented without any masker  
311 (No noise). For the Matrix sentences, a list of 20 sentences with a duration of 1.5 to 2.5 s per  
312 sentence was presented per SNR while the Story of 28 minutes was divided in 2 blocks of each  
313 5 equal parts of approximately 3 minutes. Taken together, each participant completed for both  
314 the Matrix sentences and Story, 2 blocks representing the two maskers, which each consists of 5  
315 conditions (i.e., 4 subject-specific SNRs + fixed SNR). The order of the SNRs within each block  
316 was randomized across participants.

### 317 **Signal processing**

318 All signal processing analyses were done off-line, using MATLAB R2016b.

#### 319 *Envelope reconstruction*

320 In this study, we measured neural tracking of the speech envelope by calculating the correlation  
321 between the actual, acoustic speech envelope and the reconstructed envelope from the EEG re-  
322 sponse.

323 First, the speech envelope was extracted according to Biesmans et al. (2016) i.e., filtering the  
324 target speech stimulus using a Gammatone filterbank followed by a power law (Søndergaard and  
325 Majdak, 2013; Søndergaard et al., 2012). To decrease processing time, the acoustic envelope was  
326 downsampled in a first step from 48000 Hz to 256 Hz. Then a type 2, zero-phase Chebyshev filter  
327 (80 dB attenuation at 10% of the passband) from 1 up to 8 Hz was applied to the envelope. Finally,  
328 after filtering, the speech envelope was further downsampled to 128 Hz.

329 Similar to the acoustic envelope, the EEG data was first downsampled from 8192 Hz to 256 Hz.  
330 Next, a generic EEG artifact removal algorithm based on the multi-channel Wiener filter (MWF) was  
331 applied on the EEG-data (Somers et al., 2018). More specifically, the MWF was trained based on  
332 the data from the story “Milan” and then applied on the target stimuli, the Matrix sentences and story  
333 “De Wilde Zwanen”. After artifact removal, the EEG-signals were re-referenced to the average of



334 the 64 channels. Then the data was bandpass filtered using the Chebyshev filter similar to the  
335 acoustic envelope and downsampled to 128 Hz.

336 To measure neural envelope tracking, we used the stimulus reconstruction approach described  
337 by Vanthornhout et al. (2018). More specifically, the reconstructed envelope  $\hat{s}(t)$  was obtained by  
338 applying a linear decoder on EEG signals. This decoder is a spatiotemporal filter that linearly com-  
339 bines the EEG signals of the different channels and their time shifted versions to optimally recon-  
340 struct the envelope. Mathematically, this can be formulated as follows:  $\hat{s}(t) = \sum_n \sum_\tau g(n, \tau) R(t +$   
341  $\tau, n)$ , with  $t$  the time ranging from 0 to  $T$ ,  $n$  the index of the recording electrode ranging from 1 to 64  
342 and  $\tau$  the post-stimulus integration window length. We chose an integration window from 0 until  
343 500 ms as it is shown that older adults have delayed responses (Tremblay et al., 2003; Presacco  
344 et al., 2016b; Anderson et al., 2012). The decoder was created using the mTRF toolbox (Lalor et  
345 al., 2006, 2009). More specifically, the weights of the decoder were determined in a training phase  
346 by applying ridge regression on the inverse autocorrelation matrix:  $g = (RR^T)^{-1}(RS^T)$  with  $R$  as  
347 the time-lagged matrix of the EEG signal and  $S$  the speech envelope. The decoder  $g$  was trained  
348 for each participant on the story “Milan” and contained a matrix of 64 (EEG channels) x 65 (time  
349 delays; 500 ms) elements.

350 After training, a subject-specific decoder was applied on the EEG-data of the Matrix sentences and  
351 the story “De Wilde Zwanen”. The reconstructed envelope was calculated for each condition, i.e.,  
352 each SNR, and then correlated with the actual envelope using the bootstrapped Spearman corre-  
353 lation by conducting a Monte Carlo sampling (Vanthornhout et al., 2018). A significance level of  
354 the correlation was calculated by correlating random permutations of the actual and reconstructed  
355 envelope (1000 times) and taking percentile 2.5 and 97.5 to obtain a 95% confidence interval.

### 356 *Tone pips*

357 The ASSRs evoked by the tone pips were analyzed as follows (Picton et al., 1987; Van Eeck-  
358 houtte et al., 2018; Vercammen et al., 2017; Goossens et al., 2016). First the EEG signal was  
359 re-referenced to the average of the 64 channels, high-pass filtered with a cutoff frequency of 0.5  
360 Hz and segmented in epochs of 0.521s, containing exactly one presentation of the tone pip. To  
361 remove artifacts, 5% of the epochs containing the largest peak to peak amplitudes were rejected.

362 Next, denoising source separation (DSS) was applied using the epoched EEG data as input. DSS  
363 is an algorithm based on principal component analysis which designs a spatial filter that separates  
364 neural activity into stimulus-related and stimulus-unrelated components, based on a criterion of  
365 stimulus-evoked reproducibility (de Cheveigné and Simon, 2008). After applying DSS on the raw,  
366 filtered unepoched data, the EEG data was segmented again, but now in epochs of  $\pm 2$  s to en-  
367 sure a good frequency resolution. In addition, artifacts were removed again by rejecting 5% of the  
368 epochs containing the largest peak to peak amplitudes before transforming the epochs into the  
369 frequency domain. A one-sample Hotelling  $T^2$  test (with  $\alpha = 0.05$ , Gransier et al., 2017; Hofmann  
370 and Wouters, 2012; Hotelling, 1931), was used to determine if the response amplitude differed  
371 significantly from the non-synchronized neural background activity (EEG noise). For our statistical  
372 analysis, we used the normalized SNR to one second as a measure for the size of the ASSR:  
373  $SNR(dB) = 10 \times \log_{10}\left(\frac{P_{(S+N)}}{P_N \times \text{totalseconds}}\right)$  with  $P_N$  reflecting the power of the non-synchronized neural  
374 activity and  $P_{(S+N)}$  reflecting the total power of the synchronized neural response to the tone pip  
375 and EEG noise in the frequency bin of interest (1.92 Hz).

### 376 **Cognitive tests**

377 The Flemish computerized version of the Reading Span Test (RST; Vercammen et al., 2016;  
378 van den Noort et al., 2008) and the paper version of the Stroop Test (Hammes, 1978) were used  
379 to evaluate working memory and inhibition. Although our participants were screened for cognitive  
380 impairment using the MoCA, studies have reported that even in a healthy aging population, cogni-  
381 tive function declines with age (Humes et al., 2012) and may be associated with increased cortical  
382 envelope tracking (Presacco et al., 2016a).

383 To assess working memory, participants were seated in front of a computer screen where a sen-  
384 tence was visually presented. Three sets of 20 sentences were administered, containing each 5  
385 randomized subsets of 2, 3, 4, 5 or 6 sentences (Vercammen et al., 2016). The participants were  
386 instructed to read the sentences out loud. After reading a subset, the participants were asked to re-  
387 call as many as possible of the sentence-final words of the previous subset. Additionally, they were  
388 also motivated to pay attention to the meaning of the sentences by asking three content questions.

389 The scores on the latter task were not included in their final score on 60 for the RST (Vercammen  
390 et al., 2016).

391 Lastly, a paper version of the Stroop Test (Hammes, 1978) was used to assess inhibition. Partici-  
392 pants were presented three cards of which each card contained 10 rows of each 10 elements. On  
393 the first card, the color names “red, green, yellow and blue” were printed multiple times in black ink.  
394 Participants had to read these words as accurate and fast as they could, while their response time  
395 was recorded. On the second card, rectangles were presented in the same colors and participants  
396 had to name the color. As no inhibition was needed, this is called the congruent task. Lastly, a  
397 third, incongruent, card was presented where the color names were printed in a different color than  
398 it’s meaning, e.g. the word “blue” colored red. The goal was to name the color of the words while  
399 inhibiting reading the words. The score on this test was calculated as the difference in response  
400 time (in seconds) between the third and second card. For means of visualization and interpretation  
401 of the results, the Stroop results will be analyzed by subtracting the difference score from the value  
402 “60” which is also the maximum score that can be obtained on the RST.

### 403 **Statistical analysis**

404 The statistical analyses were conducted using R software (version 3.4.4; nlme package - version  
405 3.1-131.1; Field et al. (2012); Pinheiro et al. (2017)). The effect of age on the SRT and envelope  
406 tracking was analyzed using Linear Mixed-effect Models (LMMs) as we collected multiple measure-  
407 ments per participant (e.g. two masker conditions) and these models can handle missing data well  
408 (the data of this study contains 7 missing data points; Baayen et al., 2008). The fixed-effect part  
409 of the LMMs consisted of the predictors of interest whereas the random-effect part included the  
410 variable participant, nested in one of the repeated measures predictors if this improved the model’s  
411 fit. Since no repeated measurements were conducted for the tone pips and cognitive tasks, the  
412 effect of age on these responses/scores was analyzed using Linear Fixed-effect Models (LFMs).  
413 All models were fitted using the maximum likelihood estimation.

414 The best fitting model was determined by first progressively introducing multiple fixed-effects and  
415 corresponding interactions. Then, the different models were compared using likelihood ratio tests

416 and Akaike's Information Criterion (AIC; Akaike, 1974). The best fitting model served as starting  
417 point for the evaluation of the contribution of other predictors until the final best fitted model was  
418 determined. Significant main and interaction effects of the final model are discussed in the results  
419 section by reporting the unstandardized regression coefficient ( $\beta$ ) with standard error (SE), t-Ratio  
420 and p-value per fixed-effect term. In all models, the predictors speech understanding and age were  
421 considered as continuous variables. To clearly visualize the interactions for envelope tracking at  
422 subject-specific SNRs, age was not plotted as a continuous variable in figure 5. Instead, three  
423 example regression lines representing a young (28), middle-aged (50) and older (71) person were  
424 fitted on the data. As the decline in auditory temporal processing is closely intertwined with the  
425 decrease in cognitive abilities with advancing age, we also used LMM's to assess if cognition  
426 has an additional effect on speech understanding in noise and envelope tracking, beyond age. A  
427 significance level of  $\alpha = 0.05$  was set for all the models unless otherwise stated (e.g. correction for  
428 multiple comparisons using the method of Holm, 1979).

## 429 **Results**

430 In this section, we first report the results of the behavioral speech understanding in noise experi-  
431 ment. Then, we investigate the association between speech understanding and envelope tracking,  
432 and the effect of age on envelope tracking and tone pip responses. Finally, we analyse the effect  
433 of age on cognition and the interplay between age, cognition, speech understanding in noise, and  
434 envelope tracking.

### 435 **Speech understanding in noise**

436 To assess the influence of age and masker on speech understanding in noise, we analyzed the  
437 SRTs of all participants obtained during the behavioral experiment. We can infer from figure 4 and  
438 the best fitted LMM that the SRT increased quadratically with advancing age ( $p = 0.04$ ; table 2).  
439 In addition to this, our participants achieved a significantly lower, better SRT for CT compared to  
440 SWN ( $p < 0.001$ ; table 2). Besides these main effects, we also detected a significant interaction

441 between age and the type of masker, indicating a steeper increase in SRT with advancing age when  
 442 CT was used as masker compared to SWN ( $p = 0.02$ ; table 2). We noticed after data collection that  
 443 12/47 participants completed the behavioral experiment with stimuli (both masker and target) with  
 444 maximal silence gaps of 300 instead of 200 ms. When running the analyses with the exclusion of  
 445 these participants, the same effects remained significant.

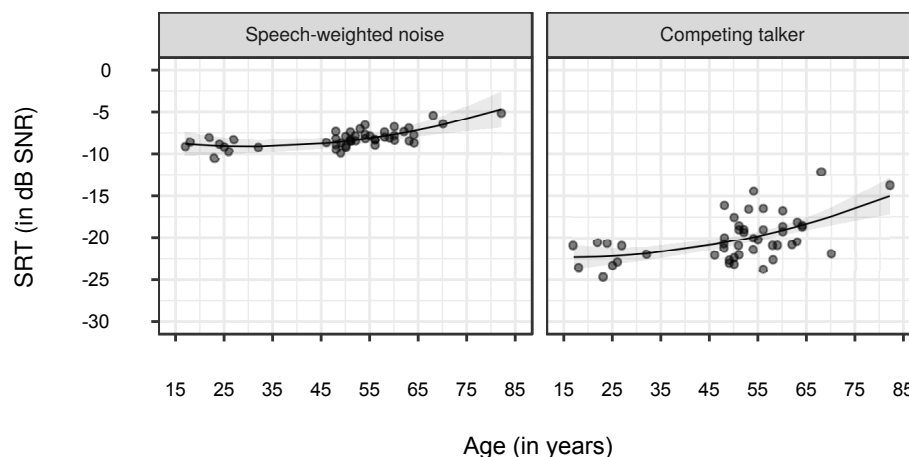

Figure 4: The speech reception threshold (SRT) for two masker types: speech-weighted noise (SWN) and a competing talker (CT) across the adults lifespan. Two regression lines with confidence intervals (shaded areas) were fitted on the data and indicate a quadratic increase of the SRT with advancing age, for both masker types. A significantly steeper slope was found for the SRT in function of age when CT was used as masker compared to SWN (see table 2).

Table 2: Linear Mixed-effect Model: The effect of age and masker on the speech reception threshold. Regression coefficients ( $\beta$  values), standard errors, t-Ratios and p-values are reported per fixed-effect term.

| Fixed-effect terms | $\beta$ value | SE       | t-Ratio | p-value |
|--------------------|---------------|----------|---------|---------|
| Intercept(for SWN) | -7.55         | 1.62     | -4.67   | < 0.001 |
| Age                | -0.102        | 0.0709   | -1.44   | 0.16    |
| Age <sup>2</sup>   | 0.00167       | 7.74e-04 | 2.16    | 0.04    |
| Masker             | -14.3         | 1.05     | -13.7   | < 0.001 |
| Age:Masker         | 0.0494        | 0.0202   | 2.44    | 0.02    |

## 446 **Envelope tracking and cortical ASSRs to tone pips**

447 In the first section, the statistical analysis regarding the association between speech understanding  
448 and envelope tracking is presented using the results obtained during the EEG experiment. Next,  
449 the results regarding the effect of age are reported. First of all, we focus on the influence of age  
450 on envelope tracking for the fixed, high intelligible SNRs as well as the subject-specific SNRs.  
451 Secondly, we assess the SNRs of the ASSRs to tone pips with advancing age to evaluate the effect  
452 of age on non-speech stimuli. To assess whether outliers have an influence on the interpretation  
453 on our data, we have run all analyses without the data of the participant aged 82 years old. The  
454 same conclusions could be drawn from these analyses.

## 455 **Effect of speech understanding, masker and speech material on neural tracking of the** 456 **speech envelope**

457 To investigate the association between speech understanding and envelope tracking, the corre-  
458 lation between the actual and reconstructed envelope was predicted using a LMM consisting of  
459 four predictors and their interactions (Table 3 and figure 5). First of all, we detected a significant  
460 main effect of speech understanding ( $p < 0.001$ ). As shown in figure 5, we obtained a significant  
461 increase in envelope tracking with increasing speech understanding. Since we found a significant  
462 interaction between speech understanding and the type of speech material or masker (SU:Speech  
463 material:  $p < 0.001$ ; SU:Masker:  $p = 0.003$ ; table 3); it seems that the steepness of this increase  
464 in envelope tracking depends on the presented speech material and masker. As we did not find  
465 a significant three-way interaction, we can infer from the LMM and figure 5 that envelope tracking  
466 increases less steeply with speech understanding when CT is used as masker compared to SWN  
467 and when the Story is used as target stimulus instead of the Matrix sentences across all ages  
468 (Table 3).

469 In addition, we also found a significant interaction between the type of masker and speech material  
470 ( $p < 0.001$ ; table 3). Holm adjusted post-hoc tests indicate a significantly lower envelope tracking  
471 for the Story compared to Matrix when CT is used as masker (mean difference between Matrix  
472 CT vs Story CT = 0.0423,  $p < 0.001$ ) while the opposite effect is found when SWN is used as

473 masker (mean difference between Matrix SWN vs Story SWN) = -0.011,  $p = 0.01$ ). Accordingly,  
474 we detected a significantly higher envelope tracking for the Matrix when CT was used as masker  
475 compared to SWN (mean difference between Matrix SWN vs Matrix CT) = -0.0252,  $p < 0.001$ ) and  
476 a significantly lower envelope tracking for the Story when CT was used compared to SWN (mean  
477 difference between Story SWN vs Story CT = 0.0281,  $p < 0.001$ ).

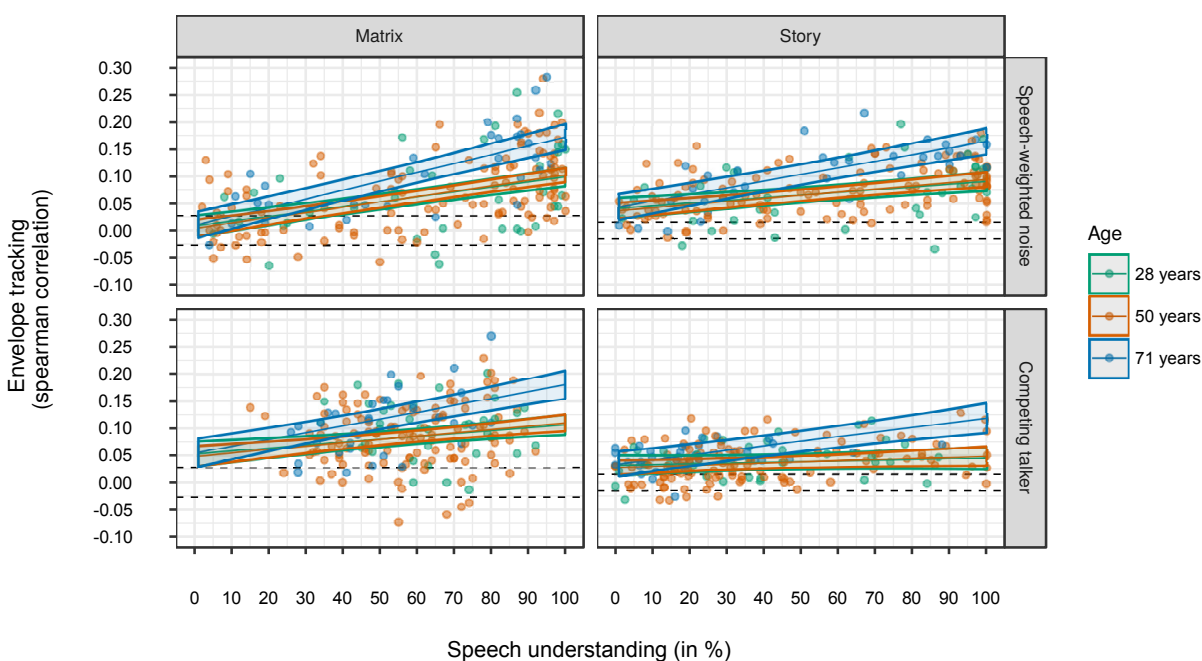

Figure 5: Neural tracking of the envelope in function of speech understanding, measured in 47 normal-hearing adults using two speech materials (Matrix and Story) and two masker types (SWN and CT). Per speech material and masker, three regression lines with confidence intervals (shaded areas) were fitted, representing the predicted data for an example person aged 28 years (young), 50 (middle-aged) or 71 (older) years old (color-coded). The dashed black lines indicate the significance level (95 % confidence interval) of our measure for envelope tracking.

Table 3: Linear Mixed-effect Model: The effect of speech understanding (SU; subject-specific SNRs), speech material, masker and age on envelope tracking. Regression coefficients ( $\beta$  values), standard errors, t-Ratios and p-values are reported per fixed-effect term.

| Fixed-effect terms        | $\beta$ value | SE       | t-Ratio | p-value |
|---------------------------|---------------|----------|---------|---------|
| Intercept(for Matrix/SWN) | 0.0286        | 0.0363   | 0.788   | 0.43    |
| SU                        | 0.00169       | 4.22e-04 | 4       | < 0.001 |
| Speech material           | 0.0326        | 0.00818  | 3.99    | < 0.001 |
| Masker                    | 0.0446        | 0.00852  | 5.24    | < 0.001 |
| Age                       | -0.00104      | 0.00161  | -0.646  | 0.52    |
| Age <sup>2</sup>          | 1.08e-05      | 1.76e-05 | 0.617   | 0.54    |
| Speech material:Masker    | -0.0533       | 0.00672  | -7.93   | < 0.001 |
| SU:Age                    | -4.56e-05     | 1.91e-05 | -2.38   | 0.02    |
| SU:Age <sup>2</sup>       | 6.30e-07      | 2.12e-07 | 2.98    | 0.003   |
| SU:Speech material        | -4.08e-04     | 1.15e-04 | -3.53   | < 0.001 |
| SU:Masker                 | -3.67e-04     | 1.24e-04 | -2.95   | 0.003   |

#### 478 **Effect of age**

479 To investigate the neural changes in speech processing with advancing age, we measured neural  
480 tracking of the envelope at different understanding levels. First, we will present the results for the  
481 two highly intelligible, fixed SNR conditions obtained by fitting a third LMM (Table 4). Next, the  
482 outcomes of the LMM reported in table 3 will be described with focus on the effect of age. Lastly,  
483 an LFM fitted on the tone pip response data will demonstrate the effect of age on non-speech  
484 sounds.

#### 485 **Speech envelope tracking at fixed, highly intelligible SNRs**

486 The LMM, summarized in table 4, showed that envelope tracking significantly increases with age  
487 in a quadratic way ( $p = 0.004$ ). As can be inferred from figure 6, it seems that envelope tracking is  
488 stable from 17 until  $\pm 50$  years and then starts to gradually increase with advancing age. In addition,



489 we detected a significant interaction between speech material and age ( $p = 0.03$ ), indicating a less  
 490 steeply increase in envelope tracking with age for the Story than the Matrix sentences (Table 4).  
 491 Lastly, we found significantly lower envelope tracking when the Matrix sentences and the Story  
 492 were presented at 0 dB SNR compared to the condition without noise ( $p < 0.001$ ; table 4).

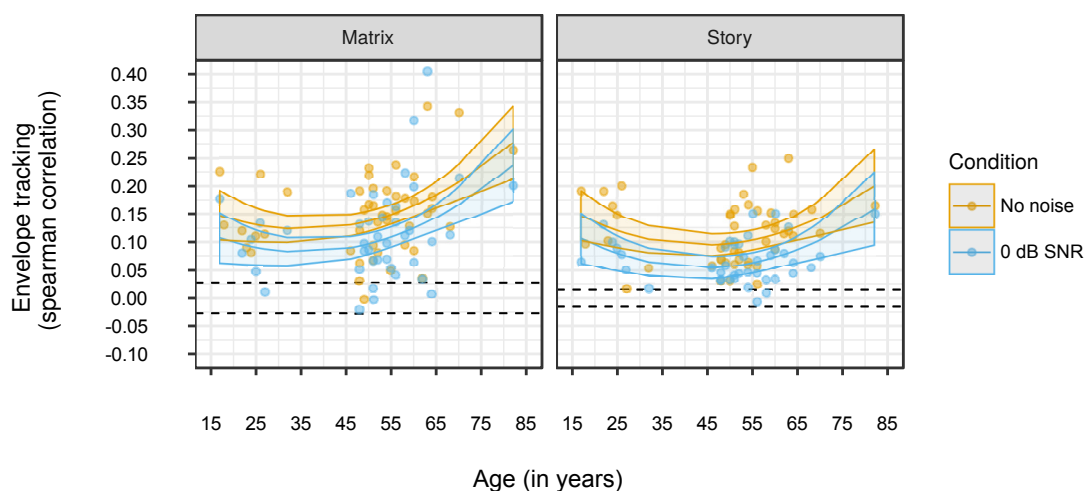

Figure 6: Neural tracking of the envelope in function of age for two fixed SNR conditions (No noise and 0 dB SNR) and two speech materials (Matrix and Story). Per fixed SNR condition (color-coded) and speech material, regression lines with confidence intervals (shaded areas) were fitted, representing envelope tracking in function of age. The dashed black lines indicate the significance level (95 % confidence interval) of our measure for envelope tracking.

Table 4: Linear Mixed-effect Model: The effect of "No noise" versus "0 dB SNR", speech material and age on envelope tracking. Regression coefficients ( $\beta$  values), standard errors, t-Ratios and p-values are reported per fixed-effect term.

| Fixed-effect terms             | $\beta$ value | SE       | t-Ratio | p-value |
|--------------------------------|---------------|----------|---------|---------|
| Intercept(for Matrix/No noise) | 0.215         | 0.0502   | 4.28    | < 0.001 |
| 0 dB SNR                       | -0.0405       | 0.00754  | -5.37   | < 0.001 |
| Speech material                | 0.0192        | 0.0276   | 0.697   | 0.49    |
| Age                            | -0.00519      | 0.00221  | -2.35   | 0.02    |
| Age <sup>2</sup>               | 7.26e-05      | 2.40e-05 | 3.02    | 0.004   |
| Speech material:Age            | -0.00118      | 5.29e-04 | -2.24   | 0.03    |

493 **Speech envelope tracking at subject-specific SNRs**

494 With regard to the effect of age, we detected a significant interaction between speech understand-  
495 ing and age indicating that the slope for envelope tracking in function of speech understanding  
496 becomes quadratically steeper with advancing age ( $p = 0.003$ ; table 3). The same conclusion  
497 can be drawn from figure 5 where three example regression lines are depicted reflecting envelope  
498 tracking in function of speech understanding for three ages, 17, 50 and 71 years. The regression  
499 lines for the young and middle-aged participant are very similar while the LMM predicts a signifi-  
500 cantly higher and steeper increase in envelope tracking with speech understanding for an example  
501 older NH participant of 71 years.

### 502 **Cortical responses to non-speech sounds: Tone pips**

503 In addition to continuous speech, we evaluated the effect of age on the responses to non-speech  
504 sounds. As depicted in figure 7 and detected by the LFM, we found that the SNR of the tone pip  
505 responses significantly decreases with age in a linear way, in contrast to speech envelope tracking  
506 ( $\beta = -0.0924$ ,  $SE = 0.0257$ ,  $p = 0.001$ ). Adding age as a quadratic fixed-effect term in the LFM  
507 did not improve the fit. To exclude the possibility that this significant decrease is due to a general  
508 decrease in neural activity with advancing age, we also analyzed the effect of age on the total  
509 power of the synchronized neural response and EEG noise together (ASSR) and the power of the  
510 EEG noise alone. Similarly to evaluating SNR as an outcome measure, we found a significant  
511 decrease in total power of the ASSR with advancing age ( $\beta = -0.00128$ ,  $SE = 2.84e-04$ ,  $p < 0.001$ )  
512 but no significant effect on the power of the EEG noise ( $\beta = -2.20e-06$ ,  $SE = 5.06e-06$ ,  $p = 0.67$ ).

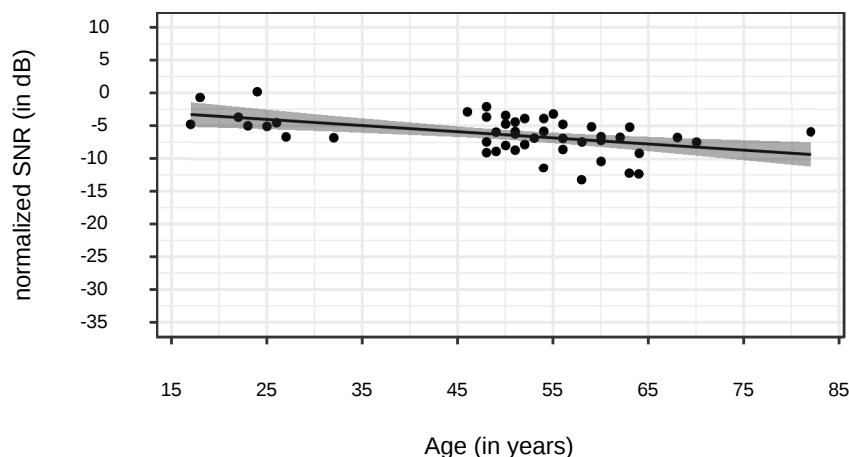

Figure 7: The SNR of the ASSR to a tone pip, with a repetition frequency of 1.92 Hz, in function of age. A regression line with confidence intervals (shaded areas) was fitted representing a linear decrease of the tone pip response with advancing age.

## 513 **Cognition**

514 In addition to the neural age-related changes in response to frequencies important for speech  
515 understanding, it is also known that with advancing age, cognitive functions deteriorate. Moreover,  
516 studies have demonstrated a strong association between the decline in cognitive functions such  
517 as working memory and inhibition, and increased difficulties with understanding speech in noise.  
518 In the next section, we will first describe the relation between age and the results on two cognitive  
519 tasks. Secondly, we will assess the specific contribution of working memory (i.e., RST scores) and  
520 inhibition (i.e., Stroop scores) on the SRT and on envelope tracking, beyond the effect of age.

## 521 **Cognition in function of age**

522 As shown in figure 8 and confirmed by the LFM with age as predictor, advancing age resulted in a  
523 decrease in cognitive abilities. We found a significant, linear decrease in both the RST scores ( $\beta =$   
524  $-0.216$ ,  $SE = 0.0669$ ,  $p = 0.002$ ) and Stroop interference scores with advancing age ( $\beta = -0.299$ ,  $SE$   
525  $= 0.0865$ ,  $p = 0.001$ ). Adding age as a quadratic fixed-effect term to the LFM did not significantly

526 improve the fit.

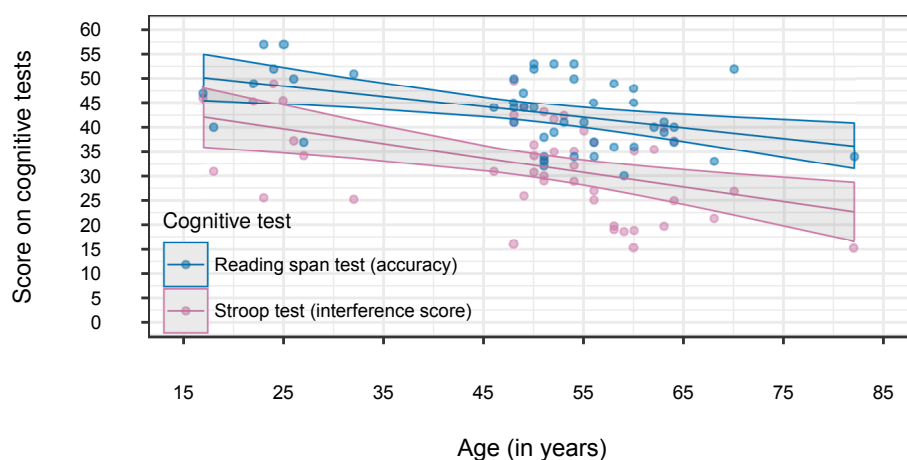

Figure 8: The results on the Reading span test and the Stroop test in function of age. The interference score is calculated as 60 seconds subtracted by the difference score between the incongruent and congruent task. Regression lines with confidence intervals (shaded areas) show a linear decline in cognitive performance with advancing age for both cognitive tests (color-coded).

527 **How does cognition relate to the effect of age on the SRT and envelope tracking?**

528 **Speech understanding in noise**

529 To better understand the interplay between cognition, age and speech understanding in noise, we  
530 used likelihood ratio tests and the AIC to evaluate if adding the Stroop or RST scores to the LMM  
531 reported in table 2, improved the model's fit. Adding the Stroop as a main, fixed-effect term to the  
532 model did not significantly improve the model's fit ( $p > 0.05$ ). This means that it is unlikely that  
533 the Stroop results explain a part of the inter-subject variability of the SRTs (improvement in  $R^2 =$   
534  $5.18e-04$  %). Adding the RST scores as a main, fixed-effect term, however, did improve the model's  
535 fit ( $p < 0.05$ ). In other words, the score on the RST explains part of the inter-subject variability of  
536 the SRT, beyond age (improvement in  $R^2 = 0.49$  %). The LMM indicated that a higher, poorer  
537 SRT was obtained for participant with a lower, worse score on the RST ( $\beta = -0.0688$ ,  $SE = 0.0299$ ,  
538  $p = 0.03$ ). As the interaction between age or type of masker and the RST scores did not further  
539 improve the model, we can assume that the differential effect of age for the two maskers depends

540 on other factors than working memory.

### 541 **Envelope tracking**

542 Lastly, we looked into the relation between envelope tracking and the scores on the cognitive tasks  
543 by adding the Stroop and RST scores as fixed-effect terms to the best fitted model described in  
544 table 3. Although adding the Stroop or RST scores as main fixed-effect terms did not improve  
545 the model's fit ( $p > 0.05$ ), likelihood ratio tests and the AIC showed an improvement when adding  
546 the interaction between the Stroop scores and the type of speech material ("Stroop:Speech ma-  
547 terial") or the interaction between the RST scores and the type of masker ("RST:Masker"). More  
548 specifically, the significant interaction between the Stroop scores and speech material indicated  
549 that enhanced envelope tracking is associated with lower, worse scores on the Stroop test, but  
550 only when the Story was the target talker ( $\beta = 0.00102$ ,  $SE = 3.32e-04$ ,  $p = 0.002$ ). A similar effect  
551 was found for the RST scores when CT was used as masker, i.e., lower, worse scores on the RST  
552 were associated with an enhanced envelope tracking ( $\beta = 0.00128$ ,  $SE = 4.35e-04$ ,  $p = 0.003$ ).

### 553 **Discussion**

554 The results of the present study demonstrate that age affects speech understanding in noise as  
555 well as neural tracking of the envelope in a quadratic way. More specifically, we found that speech  
556 understanding worsens with advancing age and that this effect is more detrimental when speech  
557 is embedded in a competing talker. Furthermore, we found that envelope tracking increases with  
558 speech understanding but that this depends on the age of the participant as well as the type of  
559 speech material and masker that was presented. In contrast to this, the cortical responses to the  
560 tone pips decreased linearly with advancing age.

### 561 **Age affects speech understanding in noise in a quadratic way**

562 Our results are in line with previous studies showing that the SRT worsens with advancing age,  
563 despite having audiometric thresholds within the normal range (Goossens et al., 2017; Helfer and  
564 Freyman, 2014; Füllgrabe et al., 2015). Similarly to the review of Moore et al. (2014), our results

565 also demonstrate a supra-linear increase in the SRT with advancing age. In line with our hypothesis  
566 and the literature (Desjardins and Doherty, 2013; Festen and Plomp, 1990; Goossens et al., 2017;  
567 Helfer and Freyman, 2014), we found that the quadratic increase in SRT with age was substantially  
568 less steep for SWN, indicating a more detrimental effect of age when speech is presented with a CT.  
569 In view of this, the substantially smaller difference in SRT between young and older adults for SWN  
570 could explain why several studies found small, non-significant differences between young versus  
571 middle-aged or older NH participants for an energetic masker (Helfer and Vargo, 2009; Schoof and  
572 Rosen, 2014). In addition, the quadratic effect of age also shows the importance of the choice of  
573 age range. For instance, the difference in SRT will be substantially larger when comparing a group  
574 of young with older NH adults when the ages of the older group range from 60 to 70 instead of 50  
575 to 60 years. Taken together, our data shows that age should be used as a continuous variable in  
576 future studies to gain more detailed insight into the effect of age on speech understanding in noise.

577 The more detrimental age effect for CT could be due to age-related temporal deficits or a decline in  
578 cognition with advancing age (CHABA, 1988; Humes et al., 2012; Pichora-Fuller et al., 2016). We  
579 assessed the specific contribution of these factors by relating the results on two cognitive tasks with  
580 speech understanding in noise. We found that the lower scores on the RST, i.e., working memory,  
581 were significantly associated with worse SRTs while no association was found between the Stroop  
582 scores and SRT. Since the association between RST and SRT yields for both masker types, our  
583 results suggest that temporal processing deficits rather than cognitive decline, may underlie the  
584 more detrimental age effect for CT. This is plausible as previous studies also found evidence for  
585 the decreased benefit of listening in the gaps with advancing age (Desjardins and Doherty, 2013;  
586 Festen and Plomp, 1990; Goossens et al., 2017; Helfer and Freyman, 2014). Nevertheless, the  
587 contribution of cognition cannot entirely be excluded because of for instance the possible lack of  
588 sensitivity of the cognitive measures used in this study. More specifically, the inhibitory processes  
589 activated for the Stroop test may be only visual orientated in contrast to the auditory speech-in-  
590 noise task. This could be a problem as the age-related decline of inhibitory processes is likely to be  
591 modality dependent (Guerreiro et al., 2010). Another possibility is the strict inclusion criteria used  
592 in the present study. Our participants are representing the best performers of a NH population  
593 across the adult lifespan which could lead to non-significant effects.

594 **Neural tracking of the speech envelope and modulations of non-speech sounds**  
595 **across the adult lifespan**

596 **Envelope tracking increases in a quadratic way with advancing age**

597 To our knowledge, this is the first study investigating the effect of age on neural tracking of envelope  
598 of running speech across the adult lifespan, i.e., including young and older but also middle-aged  
599 NH adults. Our results are in agreement with a part of the literature that demonstrates an increase  
600 in envelope tracking with advancing age (non-speech sounds: Goossens et al., 2016; Bidelman et  
601 al., 2014; Sörös et al., 2009; Rufener et al., 2016; Tlumak et al., 2015; running speech: Presacco  
602 et al., 2016b; Presacco et al., 2016a). It should be pointed out, however, that we found a quadratic  
603 relation between envelope tracking and age which has, up to our knowledge, not been demon-  
604 strated before. Moreover, a similar envelope tracking for a young (28 years) and middle-aged (51  
605 years) NH adult was found whereas envelope tracking of an example older NH person (71 years)  
606 was substantially enhanced (figure 5). Thus, in line with the studies including middle-aged par-  
607 ticipants (Goossens et al., 2016; Tlumak et al., 2015), our results suggest that aging results in a  
608 gradual enhancement in envelope tracking, most apparent at an older age. Our data corroborates  
609 with the findings of previous research that future studies should include middle-aged participants  
610 to determine the precise starting point of enhanced envelope tracking with aging.

611 **Envelope tracking increases more with speech understanding for older than young and**  
612 **middle-aged adults**

613 In line with the results for young adults (Ding and Simon, 2012; Vanthornhout et al., 2018), we  
614 found an increase in envelope tracking with increasing speech understanding for middle-aged and  
615 older NH adults. In addition, our results also demonstrated that envelope tracking for older adults  
616 increases more with increasing speech understanding than younger and middle-aged NH adults.  
617 In other words, it seems that the effect of age is more apparent when participants are better in  
618 understanding the target talker than when it is very difficult to understand speech, e.g., at 20% SU.  
619 As we found enhanced envelope tracking for similar speech understanding levels, higher envelope

620 tracking between individuals seems to not result from better speech understanding but is rather as-  
621 sociated with the degree of difficulty that persons experience when processing speech. Goossens  
622 et al. (2018) investigated the relation between speech understanding and cortical encoding of the  
623 envelope across the lifespan and found that enhanced cortical envelope encoding is related to  
624 poorer speech understanding for NH adults. Although enhanced envelope tracking is likely to re-  
625 flect the speech-in-noise difficulties in older adults, it is still unknown which factors contribute to  
626 this enhancement.

627 A first possible explanation includes the temporal deficits that adults develop with advancing age.  
628 In other words, to compensate for the speech-in-noise difficulties, older NH adults rely more on the  
629 low modulation frequencies important for speech understanding, i.e., the envelope, resulting in an  
630 enhanced envelope tracking. To date, there is evidence for this hypothesis for hearing impaired  
631 persons as studies have shown an increased sensitivity for envelope modulations in persons with  
632 sensorineural hearing loss (Wallaert et al., 2017; Millman et al., 2017). However, to our knowledge  
633 no study has found a decreased speech understanding in noise in NH older adults that was asso-  
634 ciated to increased envelope sensitivity. Secondly, it is also shown that with advancing age, the  
635 connection between brain regions deteriorates and the activity in regions outside the core speech  
636 processing network increases (Peelle et al., 2010; Wong et al., 2009; Davis et al., 2008; Cabeza,  
637 2002). Hence, decreased connectivity in older adults would result in activating more brain regions  
638 to process speech in the same way compared to their younger counterparts.

639 A similar explanation can be inferred from a cognitive perspective, where enhanced envelope track-  
640 ing could reflect the inefficient use of cognitive resources (Presacco et al., 2016a) or the increased  
641 effort that older adults experience (e.g. Degeest et al., 2015; Lemke and Besser, 2016; Anderson  
642 Gosselin and Gagné, 2011). In the present study, we related envelope tracking with the results  
643 on two cognitive tasks. In line with the results of Presacco et al. (2016a), we found that enhanced  
644 envelope tracking was associated with lower scores on the Stroop test, when the Story was pre-  
645 sented. The fact that we only found this for the Story, might be explained by the higher amount  
646 of semantic context present in the Story than Matrix (Verschueren et al., submitted). However,  
647 enhanced envelope tracking was also associated with a lower RST score, when CT was used as  
648 masker. As the RST assesses working memory, we did not expect this effect to be only present



649 for CT. It could be that certain effects may not be revealed because of the strict inclusion criteria  
650 used in this study.

651 In spite of this possible reason, the less apparent effect of age at lower understanding levels (e.g.,  
652 20% SU) supports the role of cognition or effort in enhanced envelope tracking. When it is too  
653 difficult to understand the target talker, participants are not motivated anymore and are likely to  
654 give up (Wu et al., 2016; Pichora-Fuller et al., 2016). As a result of this, a minimal amount of brain  
655 regions similar to younger adults will be active to process the stimulus. In contrast, at a higher level  
656 of speech understanding (e.g., 50 or 60% SU) older adults are more motivated and will spend more  
657 effort which could result in a higher envelope tracking. Although this is plausible, we have to note  
658 that it is also possible that the subject-specific SNR reflecting 20% SU, was too low to reconstruct  
659 the envelope from the EEG.

#### 660 **A differential effect of age for running speech versus tone pips**

661 In contrast to the enhanced envelope tracking for running speech, we found a linear decrease in  
662 cortical ASSRs with advancing age. This is in line with the study of Henry et al. (2017) who found  
663 weaker entrainment to frequency-modulated stimuli in older versus young NH adults. Conversely,  
664 studies also showed increases in cortical ASSRs to non-speech sounds (Goossens et al., 2016;  
665 Tlumak et al., 2015). Altogether, it is not likely that the differential age effect on envelope tracking  
666 versus ASSRs to tone pips can be fully attributed to the difference between speech versus non-  
667 speech sounds. Another, more likely, reason could involve the repetition frequency of the presented  
668 stimulus. The study of Tlumak et al. (2015) supports this explanation as their results suggest  
669 a turning point around 2.5 Hz from larger ASSRs in young compared to middle-aged and older  
670 adults to smaller ASSRs for higher modulation frequencies. To confirm this hypothesis, it would be  
671 interesting to include multiple modulation frequencies when evaluating the effect of age on non-  
672 speech sounds at a particular modulation frequency.

## 673 **Envelope tracking depends on the type of masker and speech material**

674 Lastly, with regard to the effect of speech material and masker, our results showed higher enve-  
675 lope tracking for Story compared to Matrix in SWN and the opposite for CT. We did not expect  
676 these results as we carefully matched most of the acoustical parameters of the target talkers (sex,  
677 root mean square level and spectrum). However, other factors such as modulation frequencies,  
678 attention or other top-down processes could underlie these results.

679 First of all, recalling the Matrix sentences out loud could make the participants more engaged in  
680 the task compared to passively listening to the Story. This is a plausible hypothesis as different  
681 studies have demonstrated the enhanced effect of attention on envelope tracking (Ding and Simon,  
682 2012; O'Sullivan et al., 2015; Das et al., 2016). However, this does not explain why we only saw  
683 this effect for SWN and not for CT. Another reason regards the higher amount of semantic context  
684 present in the Story and therefore resulting in an enhanced neural envelope tracking (Verschueren  
685 et al. submitted).

686 A possible explanation for only finding enhanced envelope tracking for the Story in SWN, is based  
687 on the use of subject-specific SNRs. Whereas the SNRs of the Matrix sentences were determined  
688 based on the outcomes of a behavioral test, the SRTs for the Story were based on ratings and  
689 then adjusted (see figure 1). Furthermore, when looking in retrospect to the data, we mainly found  
690 small correlations around the significance level when the Story was presented in CT. This may be  
691 associated to the large number of low speech understanding scores obtained for this condition.  
692 Hence, it might be necessary in future studies to adjust the speech understanding levels for the  
693 Story in CT and to also validate the self-assessed Békesy procedure for older adults.

## 694 **Future work**

695 Using a more ecologically valid measure than ABRs or ASSRs, we demonstrated a quadratic in-  
696 crease in neural envelope tracking with advancing age which can be associated to the decreased  
697 speech understanding in noise in older NH adults. Hence, envelope tracking may have the poten-  
698 tial to complement current behavioral speech-in-noise tests in the clinic. However, more studies

699 are needed to understand the underlying reasons and neural mechanisms behind this enhanced  
700 envelope tracking. First of all, it would be interesting to also administer cognitive tasks specific for  
701 the auditory modality. Secondly, including listening effort measures such as ratings, EEG-based  
702 measures or dual-task paradigms could be valuable to unravel the different reasons (review see  
703 Pichora-Fuller et al., 2016; McGarrigle et al., 2014). Last, conducting neural source analysis or  
704 using fMRI could also contribute in the search for the underlying mechanisms.

## 705 **Conclusion**

706 The present study provides new insights into the changes in envelope tracking when we grow  
707 older. Envelope tracking increases gradually with advancing age, while the tone pip responses  
708 linearly decrease. In addition, we find an association between speech understanding and envelope  
709 tracking, with a stronger association for older adults. Taking the cognitive tests results into account,  
710 enhanced envelope tracking may be the result of a higher activation of different brain regions when  
711 older adults process speech. Hence, this could reflect the inefficient use of cognitive resources or  
712 increased listening effort, often observed in behavioral research. The relation between speech  
713 understanding and envelope tracking across the lifespan supports the use of envelope tracking  
714 measures in clinical tests, such as an objective test of speech understanding (Vanthornhout et al.,  
715 2018).

## 716 **Acknowledgments**

717 First of all, we are very grateful to all participants for their help in our study as well as to master  
718 student Elien Van den Borre for her help in data acquisition. Furthermore, we want to thank Tine  
719 Goossens and Charlotte Vercammen for sharing their knowledge about conducting research in an  
720 aging population as well as Professor Astrid van Wieringen for her comments on the manuscript.

## 721 **Grants**

722 This research has received funding from the Europe project and Research Council (ERC) under  
723 the European Union's Horizon 2020 research and innovation programme (grant agreement No.  
724 637424). Furthermore, financial support is also provided by the KU Leuven Special Research  
725 Fund under grant OT/14/119 to Tom Francart and research of Jonas Vanthornhout is funded by a  
726 PhD grant of the Research Foundation Flanders (FWO).

## 727 **Disclosures**

728 The authors declare that there are no conflicts of interest.

## 729 **Author Contributions**

730 L.D, J.V., T.F conceived and designed the research; L.D performed experiments; L.D. analyzed  
731 data; L.D, J.V., T.F interpreted results of experiments; L.D. prepared figures; L.D, J.V., T.F drafted  
732 manuscript

## 733 **List of Tables**

|     |   |                                                                                              |    |
|-----|---|----------------------------------------------------------------------------------------------|----|
| 734 | 1 | Overview of the different Matrix and Story conditions for both maskers, presented            |    |
| 735 |   | during the EEG experiment (e.g. SNR at which a speech understanding (SU) score               |    |
| 736 |   | of 20% should be achieved: 20% SU). To avoid rating bias, we created the Story               |    |
| 737 |   | adjustedSRT (Figure 3). . . . .                                                              | 15 |
| 738 | 2 | Linear Mixed-effect Model: The effect of age and masker on the speech reception              |    |
| 739 |   | threshold. Regression coefficients ( $\beta$ values), standard errors, t-Ratios and p-values |    |
| 740 |   | are reported per fixed-effect term. . . . .                                                  | 21 |

|     |   |                                                                                                                                                                                                                                                                                |    |
|-----|---|--------------------------------------------------------------------------------------------------------------------------------------------------------------------------------------------------------------------------------------------------------------------------------|----|
| 741 | 3 | Linear Mixed-effect Model: The effect of speech understanding (SU; subject-specific SNRs), speech material, masker and age on envelope tracking. Regression coefficients ( $\beta$ values), standard errors, t-Ratios and p-values are reported per fixed-effect term. . . . . | 24 |
| 742 |   |                                                                                                                                                                                                                                                                                |    |
| 743 |   |                                                                                                                                                                                                                                                                                |    |
| 744 |   |                                                                                                                                                                                                                                                                                |    |
| 745 | 4 | Linear Mixed-effect Model: The effect of "No noise" versus "0 dB SNR", speech material and age on envelope tracking. Regression coefficients ( $\beta$ values), standard errors, t-Ratios and p-values are reported per fixed-effect term. . . . .                             | 25 |
| 746 |   |                                                                                                                                                                                                                                                                                |    |
| 747 |   |                                                                                                                                                                                                                                                                                |    |

## 748 List of Figures

|     |   |                                                                                                                                                                                                                                                                                                                                                                                                                                                                                                                                                                              |    |
|-----|---|------------------------------------------------------------------------------------------------------------------------------------------------------------------------------------------------------------------------------------------------------------------------------------------------------------------------------------------------------------------------------------------------------------------------------------------------------------------------------------------------------------------------------------------------------------------------------|----|
| 749 | 1 | Distribution of the number of participants per age . . . . .                                                                                                                                                                                                                                                                                                                                                                                                                                                                                                                 | 8  |
| 750 | 2 | Median air conduction thresholds (in dB HL) of young, middle-aged and older participants. Error bars indicate the interquartile range. . . . .                                                                                                                                                                                                                                                                                                                                                                                                                               | 9  |
| 751 |   |                                                                                                                                                                                                                                                                                                                                                                                                                                                                                                                                                                              |    |
| 752 | 3 | An overview of the main experiments conducted during the behavioral and EEG experiment. . . . .                                                                                                                                                                                                                                                                                                                                                                                                                                                                              | 14 |
| 753 |   |                                                                                                                                                                                                                                                                                                                                                                                                                                                                                                                                                                              |    |
| 754 | 4 | The speech reception threshold (SRT) for two masker types: speech-weighted noise (SWN) and a competing talker (CT) across the adults lifespan. Two regression lines with confidence intervals (shaded areas) were fitted on the data and indicate a quadratic increase of the SRT with advancing age, for both masker types. A significantly steeper slope was found for the SRT in function of age when CT was used as masker compared to SWN (see table 2). . . . .                                                                                                        | 21 |
| 755 |   |                                                                                                                                                                                                                                                                                                                                                                                                                                                                                                                                                                              |    |
| 756 |   |                                                                                                                                                                                                                                                                                                                                                                                                                                                                                                                                                                              |    |
| 757 |   |                                                                                                                                                                                                                                                                                                                                                                                                                                                                                                                                                                              |    |
| 758 |   |                                                                                                                                                                                                                                                                                                                                                                                                                                                                                                                                                                              |    |
| 759 |   |                                                                                                                                                                                                                                                                                                                                                                                                                                                                                                                                                                              |    |
| 760 | 5 | Neural tracking of the envelope in function of speech understanding, measured in 47 normal-hearing adults using two speech materials (Matrix and Story) and two masker types (SWN and CT). Per speech material and masker, three regression lines with confidence intervals (shaded areas) were fitted, representing the predicted data for an example person aged 28 years (young), 50 (middle-aged) or 71 (older) years old (color-coded). The dashed black lines indicate the significance level (95 % confidence interval) of our measure for envelope tracking. . . . . | 23 |
| 761 |   |                                                                                                                                                                                                                                                                                                                                                                                                                                                                                                                                                                              |    |
| 762 |   |                                                                                                                                                                                                                                                                                                                                                                                                                                                                                                                                                                              |    |
| 763 |   |                                                                                                                                                                                                                                                                                                                                                                                                                                                                                                                                                                              |    |
| 764 |   |                                                                                                                                                                                                                                                                                                                                                                                                                                                                                                                                                                              |    |
| 765 |   |                                                                                                                                                                                                                                                                                                                                                                                                                                                                                                                                                                              |    |
| 766 |   |                                                                                                                                                                                                                                                                                                                                                                                                                                                                                                                                                                              |    |

767 6 Neural tracking of the envelope in function of age for two fixed SNR conditions (No  
768 noise and 0 dB SNR) and two speech materials (Matrix and Story). Per fixed SNR  
769 condition (color-coded) and speech material, regression lines with confidence inter-  
770 vals (shaded areas) were fitted, representing envelope tracking in function of age.  
771 The dashed black lines indicate the significance level (95 % confidence interval) of  
772 our measure for envelope tracking. . . . . 25

773 7 The SNR of the ASSR to a tone pip, with a repetition frequency of 1.92 Hz, in func-  
774 tion of age. A regression line with confidence intervals (shaded areas) was fitted  
775 representing a linear decrease of the tone pip response with advancing age. . . . . 27

776 8 The results on the Reading span test and the Stroop test in function of age. The  
777 interference score is calculated as 60 seconds subtracted by the difference score  
778 between the incongruent and congruent task. Regression lines with confidence in-  
779 tervals (shaded areas) show a linear decline in cognitive performance with advanc-  
780 ing age for both cognitive tests (color-coded). . . . . 28

## 781 **References**

782 **Akaike H.** A New Look at the Statistical Model Identification. *IEEE Transactions on Automatic*  
783 *Control* 19: 716–723, 1974.

784 **Anderson S, Parbery-Clark A, White-Schwoch T, Kraus N.** Aging Affects Neural Precision of  
785 Speech Encoding. *Journal of Neuroscience* 32: 14156–14164, 2012.

786 **Anderson S, Parbery-Clark A, Yi HG, Kraus N.** A neural basis of speech in noise perception in  
787 older adults. *Ear and Hearing* 32: 750–757, 2011.

788 **Anderson Gosselin P, Gagné Jp.** Older Adults Expend More Listening Effort Than Young Adults  
789 recognizing Speech in Noise. 54: 944–958, 2011.

790 **Baayen RH, Davidson DJ, Bates DM.** Mixed-effects modeling with crossed random effects for  
791 subjects and items. *Journal of Memory and Language* 59: 390–412, 2008.

- 792 **Bidelman GM, Villafuerte JW, Moreno S, Alain C.** Age-related changes in the subcortical-cortical  
793 encoding and categorical perception of speech. *Neurobiology of Aging* 35: 2526–2540, 2014.
- 794 **Biesmans W, Das N, Francart T, Bertrand A.** Auditory-inspired speech envelope extraction meth-  
795 ods for improved {EEG}-based auditory attention detection in a cocktail party scenario. *{IEEE}*  
796 *Transactions on Neural Systems and Rehabilitation Engineering* 4320: 1—1, 2016.
- 797 **Brand T, Kollmeier B.** Efficient adaptive procedures for threshold and concurrent slope estimates  
798 for psychophysics and speech intelligibility tests. *The Journal of the Acoustical Society of Amer-*  
799 *ica* 111: 2801–2810, 2002.
- 800 **Cabeza R.** Hemispheric asymmetry reduction in older adults: The HAROLD model. *Psychology*  
801 *and Aging* 17: 85–100, 2002.
- 802 **Cahana-Amitay D, Spiro A, Sayers JT, Oveis AC, Higby E, Ojo Ea, Duncan S, Goral M, Hyun J,**  
803 **Albert ML, Obler LK.** How older adults use cognition in sentence-final word recognition. *Aging,*  
804 *Neuropsychology, and Cognition* 5585: 1–27, 2015.
- 805 **Cardin V.** Effects of aging and adult-onset hearing loss on cortical auditory regions. *Frontiers in*  
806 *Neuroscience* 10: 1–12, 2016.
- 807 **CHABA.** Speech understanding and aging. *The Journal of the Acoustical Society of America* 83:  
808 859–895, 1988.
- 809 **Coren S.** The Lateral Preference Inventory for measurement of handedness, footedness, eyed-  
810 ness, and earedness: Norms for young adults. *Bulletin of the Psychonomic Society* 31: 1–3,  
811 1993.
- 812 **Das N, Biesmans W, Bertrand A, Francart T.** The effect of head-related filtering and ear-specific  
813 decoding bias on auditory attention detection. *Journal for neural engineering* submitted: 1–9,  
814 2016.
- 815 **Davis SW, Dennis NA, Daselaar SM, Fleck MS, Cabeza R.** Qué PASA? the posterior-anterior  
816 shift in aging. *Cerebral Cortex* 18: 1201–1209, 2008.

- 817 **de Cheveigné A, Simon JZ.** Denoising based on spatial filtering. *Journal of Neuroscience Meth-*  
818 *ods* 171: 331–339, 2008.
- 819 **De Vos A, Vanvooren S, Vanderauwera J, Ghesquière P, Wouters J.** Atypical neural synchro-  
820 nization to speech envelope modulations in dyslexia. *Brain and Language* 164: 106–117, 2017.
- 821 **Decruy L, Das N, Verschueren E, Francart T.** The Self-Assessed Békesy Procedure: Validation  
822 of a Method to Measure Intelligibility of Connected Discourse. *Trends in Hearing* 22: 1–13, 2018.
- 823 **Degeest S, Keppler H, Corthals P.** The Effect of Age on Listening Effort. *Journal of Speech,*  
824 *Language, and Hearing Research* 24: 1–14, 2015.
- 825 **Desjardins JL, Doherty KA.** Age-related changes in listening effort for various types of masker  
826 noises. *Ear and hearing* 34: 261–272, 2013.
- 827 **Ding N, Simon JZ.** Adaptive Temporal Encoding Leads to a Background-Insensitive Cortical Rep-  
828 resentation of Speech. *Journal of Neuroscience* 33: 5728–5735, 2013.
- 829 **Ding N, Simon JZ.** Emergence of neural encoding of auditory objects while listening to competing  
830 speakers. *Proceedings of the National Academy of Sciences of the United States of America* 109:  
831 11854–11859, 2012.
- 832 **Drullman R, Festen JM, Plomp R.** Effect of temporal envelope smearing on speech reception.  
833 *The Journal of the Acoustical Society of America* 95: 1053–1064, 1994.
- 834 **Festen JM, Plomp R.** Effects of fluctuating noise and interfering speech on the speechreception  
835 threshold for impaired and normal hearing. *The Journal of the Acoustical Society of America* 88:  
836 1725–1736, 1990.
- 837 **Field A, Miles J, Field Z,** Mixed Designs (GLM 5) In: *Discovering Statistics Using R.* SAGE  
838 Publications Inc., 2012 p. 604–652.
- 839 **Francart T, van Wieringen A, Wouters J.** APEX 3: a multi-purpose test platform for auditory  
840 psychophysical experiments. *Journal of Neuroscience Methods* 172: 283–293, 2008.
- 841 **Francart T, van Wieringen A, Wouters J.** Comparison of fluctuating maskers for speech recog-  
842 nition tests. *International Journal of Audiology* 50: 2–13, 2011.



- 843 **Füllgrabe C, Moore BCJ, Stone MA.** Age-group differences in speech identification despite  
844 matched audiometrically normal hearing: Contributions from auditory temporal processing and  
845 cognition. *Frontiers in Aging Neuroscience* 7: 1–25, 2015.
- 846 **Goman AM, Lin FR.** Hearing loss in older adults - From epidemiological insights to national initia-  
847 tives. *Hearing Research* p. 1–4, 2018.
- 848 **Goossens T, Vercammen C, Wouters J, van Wieringen A.** Aging affects neural synchronization  
849 to speech-related acoustic modulations. *Frontiers in Aging Neuroscience* 8: 1–16, 2016.
- 850 **Goossens T, Vercammen C, Wouters J, van Wieringen A.** Masked speech perception across  
851 the adult lifespan: Impact of age and hearing impairment. *Hearing Research* 344: 109–124,  
852 2017.
- 853 **Goossens T, Vercammen C, Wouters J, van Wieringen A.** Neural envelope encoding predicts  
854 speech perception performance for normal-hearing and hearing-impaired adults. *Hearing Re-*  
855 *search* Accepted, 2018.
- 856 **Gordon-Salant S, Cole SS.** Effects of Age and Working Memory Capacity on Speech Recognition  
857 Performance in Noise Among Listeners With Normal Hearing. *Ear and Hearing* p. 1, 2016.
- 858 **Gransier R, Wieringen AV, Wouters J.** Binaural interaction effects of 30-50 Hz auditory steady-  
859 state responses. *Ear and Hearing* 38: e305–e315, 2017.
- 860 **Grose JH, Mamo SK.** Processing of Temporal Fine Structure as a Function of Age. *Ear & Hear-*  
861 *ing* 31: 755–760, 2010.
- 862 **Guerreiro MJS, Murphy DR, Van Gerven PWM.** The role of sensory modality in age-related  
863 distraction: a critical review and a renewed view. *Psychological bulletin* 136: 975–1022, 2010.
- 864 **Hammes J** 1978 De Stroop kleur-woord Test.
- 865 **Helfer KS, Freyman RL.** Stimulus and listener factors affecting age-related changes in competing  
866 speech perception. *The Journal of the Acoustical Society of America* 136: 748–59, 2014.
- 867 **Helfer KS, Vargo M.** Speech Recognition and Temporal Processing in Middle-Aged Women.  
868 *Journal of the American Academy of Audiology* 20: 264–271, 2009.

- 869 **Henry MJ, Herrmann B, Kunke D, Obleser J.** Aging affects the balance of neural entrainment  
870 and top-down neural modulation in the listening brain. *Nature Communications* 8, 2017.
- 871 **Hofmann M, Wouters J.** Improved electrically evoked auditory steady-state response thresholds  
872 in humans. *JARO - Journal of the Association for Research in Otolaryngology* 13: 573–589,  
873 2012.
- 874 **Holm S.** A Simple Sequentially Rejective Multiple Test Procedure. *Scandinavian Journal of Statis-*  
875 *tics* 6: 65–70, 1979.
- 876 **Hopkins K, Moore BCJ.** The effects of age and cochlear hearing loss on temporal fine structure  
877 sensitivity, frequency selectivity, and speech reception in noise. *The Journal of the Acoustical*  
878 *Society of America* 130: 334–349, 2011.
- 879 **Hotelling H.** The generalization of the student's ratio. *The Annals of Mathematical Statistics* 2:  
880 360–378, 1931.
- 881 **Humes LE, Dubno JR, Gordon-Salant S, Lister JJ, Cacace AT, Cruickshanks KJ, Gates GA,**  
882 **Wilson RH, Wingfield A.** Central Presbycusis: A Review and Evaluation of the Evidence. *Jour-*  
883 *nal of the American Academy of Audiology* 23: 635–666, 2012.
- 884 **International Organization for Standardization** 2000 ISO-7029: Acoustics-Statistical Distribu-  
885 tion of Hearing Thresholds as a Function of Age. Technical report, International Organization for  
886 Standardization, Geneva.
- 887 **Janse E.** A non-auditory measure of interference predicts distraction by competing speech in older  
888 adults. *Neuropsychology, development, and cognition. Section B, Aging, neuropsychology and*  
889 *cognition* 19: 741–758, 2012.
- 890 **Janse E, Jesse A.** Working memory affects older adults' use of context in spoken-word recognition.  
891 *Quarterly journal of experimental psychology (2006)* 0: 1–21, 2014.
- 892 **Koelewijn T, Zekveld Aa, Festen JM, Kramer SE.** Pupil Dilation Uncovers Extra Listening Effort  
893 in the Presence of a Single-Talker Masker. *Ear and Hearing* 33: 291–300, 2012.

- 894 **Kong YY, Somarowthu A, Ding N.** Effects of Spectral Degradation on Attentional Modulation of  
895 Cortical Auditory Responses to Continuous Speech. *Journal of the Association for Research in*  
896 *Otolaryngology* 16: 783–796, 2015.
- 897 **Kraus N, Anderson S.** The Effects of Aging on Auditory Processing. *The Hearing journal* 66: 36,  
898 2013.
- 899 **Lalor EC, Power AJ, Reilly RB, Foxe JJ.** Resolving Precise Temporal Processing Properties  
900 of the Auditory System Using Continuous Stimuli. *Journal of Neurophysiology* 102: 349–359,  
901 2009.
- 902 **Lalor EC, Pearlmutter BA, Reilly RB, McDarby G, Foxe JJ.** The VESPA: A method for the rapid  
903 estimation of a visual evoked potential. *NeuroImage* 32: 1549–1561, 2006.
- 904 **Leigh-Paffenroth ED, Fowler CG.** Amplitude-Modulated Auditory Steady-State Responses in  
905 Younger and Older Listeners. *Journal of American Academy of Audiology* 17: 582–597, 2006.
- 906 **Lemke U, Besser J.** Cognitive Load and Listening Effort : Concepts and Age-Related Consider-  
907 ations. *Ear & Hearing* 37: 77S–84S, 2016.
- 908 **Lopes da Silva F.** EEG and MEG: Relevance to neuroscience. *Neuron* 80: 1112–1128, 2013.
- 909 **Luts H, Jansen S, Dreschler W, Wouters J** 2014 Development and normative data for the Flem-  
910 ish/Dutch Matrix test Technical report, Department of NeuroSciences, ExpORL, Leuven.
- 911 **Macpherson A, Akeroyd MA.** Variations in the slope of the psychometric functions for speech  
912 intelligibility: A systematic survey. *Trends in Hearing* 18: 10–16, 2014.
- 913 **Margolis RH, Saly GL.** Asymmetric hearing loss: definition, validation, and prevalence. *Otology*  
914 *& neurotology : official publication of the American Otological Society, American Neurotology*  
915 *Society [and] European Academy of Otology and Neurotology* 29: 422–31, 2008.
- 916 **Martin JS, Jerger JF.** Some effects of aging on central auditory processing. *The Journal of*  
917 *Rehabilitation Research and Development* 42: 25, 2005.

- 918 **McGarrigle R, Munro KJ, Dawes P, Stewart AJ, Moore DR, Barry JG, Amitay S.** Listening effort  
919 and fatigue: what exactly are we measuring? A British Society of Audiology Cognition in Hearing  
920 Special Interest Group 'white paper'. *International journal of audiology* 53: 433–40, 2014.
- 921 **Millman RE, Mattys SL, Gouws AD, Prendergast G.** Magnified Neural Envelope Coding Predicts  
922 Deficits in Speech Perception in Noise. *The Journal of Neuroscience* 37: 7727–7736, 2017.
- 923 **Moore DR, Edmondson-Jones M, Dawes P, Fortnum H, McCormack A, Pierzycki RH, Munro**  
924 **KJ.** Relation between speech-in-noise threshold, hearing loss and cognition from 40-69 years  
925 of age. *PLoS ONE* 9, 2014.
- 926 **Nasreddine ZS, Phillips Na, Bedirian V, Charbonneau S, Whitehead V, Collin I, Cummings**  
927 **JL, Chertkow H.** The Montreal Cognitive Assessment, MoCA: A Brief Screening Tool For Mild  
928 Cognitive Impairment. *Journal of the American Geriatrics Society* 53: 695–699, 2005.
- 929 **O’Sullivan Ja, Power aJ, Mesgarani N, Rajaram S, Foxe JJ, Shinn-Cunningham BG, Slaney**  
930 **M, Shamma Sa, Lalor EC.** Attentional Selection in a Cocktail Party Environment Can Be De-  
931 coded from Single-Trial EEG. *Cerebral Cortex* 25: 1697–1706, 2015.
- 932 **Peelle JE, Gross J, Davis MH.** Phase-Locked Responses to Speech in Human Auditory Cortex  
933 are Enhanced During Comprehension. *Cerebral Cortex* 23: 1378–1387, 2013.
- 934 **Peelle JE, Troiani V, Wingfield A, Grossman M.** Neural processing during older adults’ compre-  
935 hension of spoken sentences: Age differences in resource allocation and connectivity. *Cerebral*  
936 *Cortex* 20: 773–782, 2010.
- 937 **Peelle JE, Wingfield A.** The Neural Consequences of Age-Related Hearing Loss. *Trends in*  
938 *Neurosciences* 39: 486–497, 2016.
- 939 **Pichora-Fuller MK, Kramer SE, Eckert MA, Edwards B, Hornsby BW, Humes LE, Lemke U,**  
940 **Lunner T, Matthen M, Mackersie CL, Naylor G, Phillips NA, Richter M, Rudner M, Sommers**  
941 **MS, Tremblay KL, Wingfield A.** Hearing Impairment and Cognitive Energy. *Ear and Hearing* 37:  
942 5S–27S, 2016.
- 943 **Pichora-fuller MK, Souza PE.** Effects of aging on auditory processing of speech. *International*  
944 *Journal of Audiology* 42: 11–16, 2003.

- 945 **Picton TW, Vajsar J, Rodriguez R, Campbell KB.** Reliability estimates for steady-state  
946 evoked potentials. *Electroencephalography and Clinical Neurophysiology Evoked Potentials* 68:  
947 119–131, 1987.
- 948 **Pinheiro J, Bates D, DebRoy S, Sarkar D, Team RC** 2017 nlme: Linear and Nonlinear Mixed  
949 Effects Models.
- 950 **Poelmans H, Luts H, Vandermosten M, Boets B, Ghesquière P, Wouters J.** Auditory steady  
951 state cortical responses indicate deviant phonemic-rate processing in adults with dyslexia. *Ear*  
952 *and Hearing* 33: 134–143, 2012.
- 953 **Power AJ, Colling LJ, Mead N, Barnes L, Goswami U.** Neural encoding of the speech envelope  
954 by children with developmental dyslexia. *Brain and Language* 160: 1–10, 2016.
- 955 **Presacco A, Simon JZ, Anderson S.** Effect of informational content of noise on speech repre-  
956 sentation in the aging midbrain and cortex. *Journal of neurophysiology* 116: 2356–2367, 2016a.
- 957 **Presacco A, Simon JZ, Anderson S.** Evidence of degraded representation of speech in noise,  
958 in the aging midbrain and cortex. *Journal of neurophysiology* 116: 2346–2355, 2016b.
- 959 **Rufener KS, Oechslin MS, Wöstmann M, Dellwo V, Meyer M.** Age-Related Neural Oscilla-  
960 tion Patterns During the Processing of Temporally Manipulated Speech. *Brain Topography* 29:  
961 440–458, 2016.
- 962 **Schoof T, Rosen S.** The role of auditory and cognitive factors in understanding speech in noise  
963 by normal-hearing older listeners. *Frontiers in Aging Neuroscience* 6: 1–14, 2014.
- 964 **Shannon RV, Zeng FG, Kamath V, Wygonski J, Ekelid M.** Speech recognition with primarily  
965 temporal cues. *Science* 270: 303–304, 1995.
- 966 **Singh-Manoux A, Kivimaki M, Glymour MM, Elbaz A, Berr C, Ebmeier KP, Ferrie JE, Dugravot**  
967 **A.** Timing of onset of cognitive decline: results from Whitehall II prospective cohort study.  
968 *Bmj* 344: d7622–d7622, 2012.
- 969 **Somers B, Francart T, Bertrand A.** A generic EEG artifact removal algorithm based on the multi-  
970 channel Wiener filter. *Journal of Neural Engineering* 15, 2018.

- 971 **Søndergaard P, Torrèsani B, Balazs P.** The Linear Time Frequency Analysis Toolbox. *International Journal of Wavelets, Multiresolution and Information Processing* 10: 1–45, 2012.
- 972
- 973 **Søndergaard PL, Majdak P,** The auditory modeling toolbox. In: *The technology of binaural listening.*, edited by Blauert J. Springer Berlin Heidelberg, 2013 p. 33–56.
- 974
- 975 **Sörös P, Teismann IK, Manemann E, Lütkenhöner B.** Auditory temporal processing in healthy
- 976 aging: A magnetoencephalographic study. *BMC Neuroscience* 10: 1–9, 2009.
- 977 **Tlumak AI, Durrant JD, Delgado RE.** The Effect of Advancing Age on Auditory Middle- And
- 978 Long-Latency Evoked Potentials Using a Steady-State-Response Approach. *American Journal of Audiology* 24: 494–507, 2015.
- 979
- 980 **Tremblay KL, Piskosz M, Souza P.** Effects of age and age-related hearing loss on the neural
- 981 representation of speech cues. *Clinical Neurophysiology* 114: 1332–1343, 2003.
- 982 **United Nations** 2017 World Population Prospects: The 2017 Revision, Key Findings and Advance
- 983 Tables Technical report, United Nations.
- 984 **van den Noort M, Bosch P, Haverkort M, Hugdahl K.** A Standard Computerized Version of the
- 985 Reading Span Test in Different Languages. *European Journal of Psychological Assessment* 24:
- 986 35–42, 2008.
- 987 **Van Eeckhoutte M, Luke R, Wouters J, Francart T.** Stability of Auditory Steady State Responses
- 988 Over Time. *Ear and Hearing* p. 260–268, 2018.
- 989 **Van Lier H, Drinkenburg WH, Van Eeten YJ, Coenen AM.** Effects of diazepam and zolpidem on
- 990 EEG beta frequencies are behavior-specific in rats. *Neuropharmacology* 47: 163–174, 2004.
- 991 **Vanthornhout J, Decruy L, Wouters J, Simon J, Francart T.** Speech intelligibility predicted from
- 992 neural entrainment of the speech envelope. *JARO - Journal of the Association for Research in Otolaryngology* 19: 181–191, 2018.
- 993
- 994 **Vercammen C, Goossens T, Wouters J, van Wieringen A.** How age affects memory task per-
- 995 formance in clinically normal hearing persons. *Aging, Neuropsychology, and Cognition* 5585:
- 996 1–17, 2016.

- 997 **Vercammen C, van Wieringen A, Wouters J, Francart T.** Desynchronisation of auditory steady-  
998 state responses related to changes in interaural phase differences: an objective measure of  
999 binaural hearing. *International Journal of Audiology* 56: 464–471, 2017.
- 1000 **Wallaert N, Moore BCJ, Ewert SD, Lorenzi C.** Sensorineural hearing loss enhances auditory  
1001 sensitivity and temporal integration for amplitude modulation. *The Journal of the Acoustical*  
1002 *Society of America* 141: 971–980, 2017.
- 1003 **Wayne RV, Johnsrude IS.** A review of causal mechanisms underlying the link between age-related  
1004 hearing loss and cognitive decline. *Ageing Research Reviews* 23: 154–166, 2015.
- 1005 **Wong PC, Jin JX, Gunasekera GM, Abel R, Lee ER, Dhar S.** Aging and cortical mechanisms of  
1006 speech perception in noise. *Neuropsychologia* 47: 693–703, 2009.
- 1007 **World Health Organization** 2015 World Report on Ageing and Health Technical report, World  
1008 Health Organization.
- 1009 **Wu Yh, Stangl E, Zhang X, Perkins J, Eilers E.** Psychometric Functions of Dual-Task Paradigms  
1010 for Measuring Listening Effort. *Ear & Hearing* p. 1–11, 2016.
